# Supplementary material for: Genetic Inhibition of APOL1 Pore-Forming Function Prevents APOL1-Mediated Kidney Disease
Source: PubMed Central journal article supplement — J Am Soc Nephrol. 2023 Oct 6;34(11):1889–99. doi: 10.1681/ASN.0000000000000219 (PMC10631602; doi:10.1681/asn.0000000000000219), 2023-10-06
Supplement: jasn-34-1889-s001.pdf [file jasn-34-1889-s001.pdf]

## Supplementary Appendix

### Genetic inhibition of APOL1 pore function confers protection against APOL1 mediated kidney disease

Adriana M. Hung, MD, MPH<sup>1,2</sup>, Victoria A. Assimon, PhD<sup>3,†</sup>, Hua-Chang Chen, PhD<sup>1,4,†</sup>, , Zhihong Yu, MS<sup>1,4,†</sup>, Caitlyn Vlasschaert, MD<sup>5</sup>, Jefferson Triozzi MD<sup>2</sup>, Helen Chan, BS<sup>3</sup>, Lee Wheless, MD, PhD<sup>6</sup>, Otis Wilson, BA<sup>1,2</sup>, Shailja Shah, MD, MPH<sup>7</sup>, Taralynn Mack, BA<sup>1,8</sup>, Trevor Thompson, BA<sup>2</sup>, Michael E. Matheny MD, MPH<sup>1,4,9</sup>, Saranya Chandrasekar, MS<sup>3</sup>, Sahar V Mozaffari, PhD<sup>3</sup>, Cecilia P. Chung, MD, MPH<sup>10</sup>, Philip Tsao, PhD<sup>14,15,3</sup>, Katalin Susztak, MD, PhD<sup>11</sup>, Edward D. Siew, MD MSCI<sup>1,2</sup>, Karol Estrada PhD<sup>3</sup>, J. Michael Gaziano, MD<sup>12,13</sup>, Robert R. Graham, PhD<sup>3</sup>, Ran Tao, PhD<sup>1,4</sup>, Maarten Hoek, PhD<sup>3</sup>, Cassianne Robinson-Cohen, PhD<sup>2</sup>, , Eric M. Green, MD, PhD<sup>3\*</sup>, Alexander G Bick, MD, PhD<sup>8,12,\*</sup>, for the Million Veteran Program.

<sup>1</sup>Nashville VA Medical Center, VA Tennessee Valley Healthcare System, Nashville, TN.

<sup>2</sup>Division of Nephrology & Hypertension, Department of Medicine, Vanderbilt University Medical Center, Nashville, TN.

<sup>3</sup>MAZE Therapeutics, South San Francisco, CA.

<sup>4</sup>Department of Biostatistics, Vanderbilt University Medical Center, Nashville, TN

<sup>5</sup>Department of Dermatology, Vanderbilt University Medical Center, Nashville TN.

<sup>6</sup>VA San Diego Healthcare System and UC San Diego Health, La Jolla CA

<sup>7</sup>Division of Genetic Medicine, Department of Medicine, Vanderbilt University Medical Center, Nashville, TN.

<sup>8</sup>Department of Biomedical Informatics, Vanderbilt University Medical Center, Nashville, TN.

<sup>9</sup>Renal, Electrolyte, and Hypertension Division, Department of Medicine, University of Pennsylvania, Perelman School of Medicine, Philadelphia, Pennsylvania.

<sup>10</sup>VA Cooperative Studies Program, VA Boston Healthcare System, Boston, MA

<sup>11</sup>Department of Medicine, Brigham and Women's Hospital and Harvard School of Medicine, Boston, MA

+

†Drs. Assimon and Chen contributed equally to this work.

\*Drs. Hung, Green and Bick jointly supervised this work

Correspondence to Dr. Hung, 1611 21st Ave S, S3223 MCN, Nashville, TN 37232 or [adriana.hung@vumc.org](mailto:adriana.hung@vumc.org)

## **Table of Contents**

Methods used in the mechanistic studies and functional genomics.

**Supplementary Table 1:** BioVU Cohort Characteristics stratified by *APOL1* genotype.

**Supplementary Table 2:** NIH All of Us Cohort Characteristics stratified by *APOL1* genotype.

**Supplementary Table 3.** ESRD definition.

**Supplementary Table 4.** Definitions and procedure codes for dialysis and comorbidities.

**Supplementary Table 5:** MVP *APOL1* high risk and p.N264K association with chronic kidney disease.

**Supplementary Table 6:** MVP *APOL1* high risk and p.N264K association with End Stage

**Supplementary Table 7.** MVP Cohort Characteristics stratified by *APOL1* N264K genotype.

**Supplementary Table 8:** BioVU *APOL1* high risk and p.N264K association with kidney disease outcomes amongst non-diabetic individuals.

**Supplementary Table 9:** All of Us *APOL1* high risk and p.N264K association with kidney disease outcomes amongst non-diabetic individuals.

**Supplementary Table 10.** MVP Core acknowledgement.

**Supplementary Table 11.** Haplotype frequency of *APOL1* protein-altering variants in African populations with more than 20 individuals for the haplotype in the Million Veteran Program.

**Supplementary Table 12** Distribution of N264K genotypes in *APOL1* low-risk and high-risk genotypes.

**Supplementary Figure 1.** *APOL1* protein expression in G0, G1, and G2 podocyte cell lines.

**Supplementary Figure 2.** Additional characterization of *APOL1* cell lines utilized in the calcium uptake assay.

## Methods used in the mechanistic studies and functional genomics

**Maintenance and generation of APOL1 podocyte cell lines utilized in viability assay.** The hTERT-immortalized kidney podocyte cell line was procured from the laboratory of Dr. Moin Saleem at the University of Bristol, UK (doi:10.1111/j.1440-1797.2012.01619.x). All cell lines were cultured in RPMI media (Gibco) with 10% Tet System Approved FBS (Takara, 631101) according to a previous report. Cell lines were maintained and engineered at 33°C. Cell cultures were transferred to 37°C for at least 10 days to initiate differentiation and subsequently used in viability and protein level (HiBiT assay) experiments (10.1681/ASN.V133630).

Coding sequences of APOL1 G0, G1, G2 with and without the p.N264K variant were cloned into the pLVX-TetOne-Puro vector and verified by sequencing (Genscript Biotech). All constructs were designed to have a C-terminal HiBiT tag. *Lentiviral packaging of vectors was conducted with the Lenti-X Packaging Single Shots (VSVG) system* according to manufacturer instructions (Takara Bio, 631275). Approximately 24 hours before transfection, LentiX293T packaging cells were seeded at a density of 4–5 x 10<sup>6</sup> cells/10-cm plate. After transfection, viral supernatants were collected at 48- and 72-hours and pooled. The pooled viral supernatant was concentrated 10x using a Lenti-X Concentrator (Takara Bio, 631231). A stable cell line was generated by transfecting the podocyte cell line with concentrated virus (300 µL) in media with 5 µg/mL polybrene (Sigma, TR-1003-G). Media was changed the following day. 72-hours post transfection, 2.5 µg/mL puromycin (Gibco, A1113803) was added to the cells and cells were maintained in selection media thereafter. APOL1 stable cellular pools (G0, G1, G2, G0 p.N264K, G1 p.N264K, and G2 p.N264K) were subjected to a stringent limiting dilution to generate pure stable clones. Clones were selected to have similar levels of APOL1 expression.

**Viability assay with APOL1 podocyte cell lines.** All experiments were performed in 384-well, white, solid bottom, tissue culture treated plates (Greiner, 781080). 30 µL of podocytes (6000 cells/well final) in media were added to each well of an assay ready plate containing a 15-step 2-fold titration of doxycycline. Final concentrations of doxycycline ranged from 0 to 1000 ng/mL. Plates were incubated for 96 hours (humidified, 37°C with 5% CO<sub>2</sub>). After the incubation, the plates were equilibrated at room temperature for 10 minutes and then 15 µL of CellTiter-Glo reagent (Promega, G7570) was added to each well. Plates were placed on an orbital shaker (300 rpm) for 3 minutes to induce cell lysis and then incubated at room temperature for 10 minutes. Luminescence was measured on an Envision plate reader. GraphPad PRISM software (Version 8) was utilized for plotting data as ± SEM. Data in Figure 3C represents toxicity values at a single concentration of doxycycline (500ng/mL) that was determined to have matched APOL1 expression across the clonal cell lines as determined by a HiBiT assay.

**Nano-Glo® HiBiT Lytic assay with APOL1 podocyte cell lines to determine APOL1 expression.** All experiments were performed in 384-well, white, solid bottom, tissue culture treated plates (Greiner, 781080). 30 µL of podocytes (6000 cells/well final) in media were added to each well of an assay ready plate containing a 15-step 2-fold titration of doxycycline. Final concentrations of doxycycline ranged from 0 to 1000 ng/mL. Plates were incubated for 6 hours (humidified, 37°C with 5% CO<sub>2</sub>). A short induction time was chosen to quantify protein expression while viability was >95% for all cell lines. Afterwards, plates were equilibrated at room temperature for 10 minutes and then 30 µL of NanoGlo HiBiT Lytic reagent (containing Lytic Buffer, LgBiT, and NanoLuc substrate prepared following datasheet instructions) was added to each well. Plates were placed on an orbital shaker (300 rpm) for 3 minutes and then

incubated at room temperature for 10 minutes. Luminescence was measured on an Envision plate reader. GraphPad PRISM® software (Version 8) was utilized for plotting data as relative light units (RLU) ± SEM.

**Generation of APOL1 G2 and G2 p.N264K HEK293 cell lines utilized in calcium uptake assay.** Coding sequences of APOL1 G2 and APOL1 G2 p.N264K were subcloned into the pcDNA™5/TO T-REx mammalian expression construct and verified by sequencing. The host cell line, HEK-293 T-REx/GCaMP6f K4.1, was stably transfected with these constructs to generate target cell lines that inducibly express APOL1 G2 or APOL1 G2 p.N264K. Gene Pulser Xcell™ Eukaryotic System (Bio-Rad) was used for transfections. Specifically, to  $3 \times 10^6$  cells resuspended in 0.8 mL Opti-MEM was added 10 µg of plasmid DNA. This mixture was subjected to electroporation (square wave protocol: 220 V, 25 ms pulse). After electroporation, cells were diluted in fresh prewarmed complete media and plated in a T75 flask. Antibiotics were added (30 µg/mL Hygromycin B for APOL1 G2 transfected cells and 0.3 mg/mL G418 for APOL1 G2 p.N264K transfected cells) to the appropriate cultures 48 hours after transfection. After antibiotic selection, the stable cellular pools were subjected to a stringent limiting dilution to generate pure stable clones. Cell lines were generated at Axxam S.p.A.

**Maintenance of APOL1 G2, G2 p.N264K, and isogenic mock HEK293 cell lines.** APOL1 cell lines were maintained in Dulbecco's Modified Eagle Medium (DMEM, BioWhittaker, BE12-614F; 500 mL) supplemented with 10% Performance Plus Serum (Gibco, 16000-044; 50 mL), 1x Penicillin-Streptomycin (BioWhittaker, DE17-602E; 5 mL of 100x solution), Ultraglutamine-1 (BioWhittaker, BE 17-605E/U1; 5 mL of 200 mM solution in 0.85% NaCl), 2.5 µg/mL of Blasticidin (InvivoGen, ant-bl), and 25 µg/mL of Zeocin (InvivoGen, ant-zn). 30 µg/mL of Hygromycin B Gold (InvivoGen, ant-hg-1) or 0.3 mg/mL of G418 (SIGMA, G8168) were also added to complete medium for APOL1 G2 or APOL1 p.N264K cell lines, respectively.

The isogenic mock cell line was maintained in DMEM (500 mL) supplemented with 10% Performance Plus Serum (50 mL), 1x Penicillin-Streptomycin (5 mL of 100x solution), Ultraglutamine-1 (5 mL of 200 mM solution in 0.85% NaCl), 5 µg/mL of Blasticidin, and 50 µg/mL of Zeocin. Note, all the selective agents (except Pen-Strep) were removed from cell culture medium while cell thawing and cell seeding.

Cells were split by gentle wash with PBS, followed by 5 minutes incubation at 37°C with trypsin-EDTA solution. Detached cells were diluted with complete medium, counted, and the desired number of cells was plated into a new flask or used for experiments.

**Calcium uptake assay with APOL1 G2, G2 p.N264K, and isogenic mock HEK293 cell lines.**

Cells were detached from 70-80% confluent flasks and dispensed (20,000 cells/well final) into 384-well, black, clear bottom, poly-D-lysine coated plates in a volume of 25 µL/well. The following day, cells were induced with doxycycline for 6 hours at 37°C (humidified with 5% CO<sub>2</sub>) by adding 25 µL/well of 100 ng/mL doxycycline dissolved in fresh complete medium (final concentration = 50 ng/mL). After doxycycline induction, media was manually removed from all wells, replaced with 10 µL Tyrode's buffer (130 mM NaCl, 5 mM KCl, 10 mM CaCl<sub>2</sub>, 1 mM MgCl<sub>2</sub>, 5 mM NaHCO<sub>3</sub>, 20 mM HEPES, pH 7.4), and incubated at room temperature for 10 minutes. Next, to each well was added 10 µL of a calcium dilution series made using Tyrode's buffer (final top concentration of calcium = 5 mM) via online injection. The fluorescent signal was measured for 3 minutes after injection using a FLIPR<sup>TETRA</sup> plate reader ( $\lambda_{exc}$  470-495 nm,  $\lambda_{em}$  515-575 nm). The instrument settings (exposure time, excitation intensity, and gain) were regulated to obtain a baseline signal of less than 5,000 RFU. FLIPR<sup>TETRA</sup> measurements were

analyzed with Screenworks© software (Molecular Devices, Version 4.1). Data were exported as Response (F, maximum fluorescence) over Baseline (F0, baseline fluorescence before injection) with the baseline subtraction ( $\Delta F/F_0$ ). These data represent averages of two independent experiments performed in quadruplicate. Mean and standard deviations were calculated with Excel software. These values were used to create sigmoidal dose-response curves (variable slope) using GraphPad PRISM software (Version 8). Experimental data was generated at Axxam S.p.A.

**qPCR of APOL1 G2, G2 p.N264K, isogenic mock HEK293 cell lines.** Total RNA was extracted from  $1 \times 10^6$  cells using the Maxwell® RSC simplyRNA Tissue Kit (Promega, AS1340) according to manufacturer instructions. The extracted RNA was reverse transcribed with the LunaScript RT SuperMix Kit (New England Biolabs, BE3010L). The quality of RNA/cDNA was tested by checking efficiency and signal strength of a “real time” quantification of *Homo sapiens* GAPDH with the following primers: (1) hGAPDH fw exon6 = GTTCGTCATGGGTGTGAACC and (2) hGAPDH rev exon7 = CTAAGCAGTTGGTGGTGCAG. Primers for the amplification of APOL1 were designed to be specific for the codon optimized mRNA sequence of the gene: (1) APOL1 fw = GAGCCTGGACAAGCTGAAAG and (2) APOL1 rev ACAGACTGCAGATTGGCTCT. The expression levels of the target and the housekeeping gene were quantified using SybrGreen technology. Each 20  $\mu$ L reaction contained cDNA, 0.3  $\mu$ M of each primer, and 2x qPCRBIO SyGreen Blue Mix Lo-ROX master mix (Resnova, PB20.15-20). A given reaction mixture was then divided into 4 technical replicates of 4  $\mu$ L each. Non-template control reactions containing master mix, primers, and water (instead of cDNA) were also included in each experiment. Prepared samples were then subjected to the following amplification protocol:

- (1) 2 minutes 95°C, 1 cycle
- (2) 5 seconds 95°C and 30 seconds 95°C, 40 cycles
- (3) 15 seconds 95°C, 1 cycle
- (4) 1 minute 60°C, 1 cycle
- (5) 15 seconds 95°C, 1 cycle

Acquired data was analyzed using QuantStudio™ Real-Time PCR software. Target-specific (APOL1) signals were normalized to the housekeeping gene, GAPDH, as an indicator of the total cDNA content. Relative Expression Units (REU) were calculated using the  $\Delta C_t$  method according to the following equation:  $REU = 2^{-\Delta C_t} \times 10^5$ ; with  $\Delta C_t = C_t(\text{target}) - C_t(\text{GAPDH})$ . The factor  $10^5$  was introduced to obtain more intuitive REU values. Experimental data was generated at Axxam S.p.A. and plotted using GraphPad PRISM® software (Version 8).

**Cell viability assay with APOL1 G2, G2 p.N264K, isogenic mock HEK293 cell lines.**

CellTiter-Glo® viability assays were performed in concordance with cellular calcium uptake experiments. Specifically, using the same assay plates, viability measurements were collected immediately after GCaMP6f fluorescence values were recorded from calcium uptake experiments. Reconstituted CellTiter-Glo reagent was added to media present in the wells in a 1:1 volumetric ratio. Plates were incubated for 15 minutes in the dark at room temperature and luminescence was recorded using a FLIPR<sup>TETRA</sup> plate reader after incubation. These data represent averages of two independent experiments performed in quadruplicate. Mean and standard deviations were calculated with Excel software. Experimental data was generated at Axxam S.p.A. and plotted using GraphPad PRISM software (Version 8).

**Supplementary Table 1:** BioVU Cohort Characteristics stratified by *APOL1* genotype.

|                                                         | <b>No <i>APOL1</i> p.N264K alleles</b> |                               | <b>≥1 <i>APOL1</i> p.N264K alleles</b> |                               |
|---------------------------------------------------------|----------------------------------------|-------------------------------|----------------------------------------|-------------------------------|
|                                                         | <b><i>APOL1</i> Low Risk</b>           | <b><i>APOL1</i> High Risk</b> | <b><i>APOL1</i> Low Risk</b>           | <b><i>APOL1</i> High Risk</b> |
|                                                         | <i>N</i> =11578                        | <i>N</i> =2105                | <i>N</i> =603                          | <i>N</i> =100                 |
| Age, median [IQR], years                                | 45.0 [31.0;60.0]                       | 45.0 [31.0;59.0]              | 45.0 [31.0;60.0]                       | 49.0 [32.0;60.0]              |
| Male, n, (%)                                            | 4397 (38.0%)                           | 827 (39.3%)                   | 232 (38.5%)                            | 44 (44.0%)                    |
| Diabetes, n, (%)                                        | 3057 (26.4%)                           | 368 (17.5%)                   | 155 (25.7%)                            | 13 (13.0%)                    |
| Body Mass Index, median [IQR]                           | 30.0 [24.7;36.6]                       | 28.5 [23.9;36.3]              | 34.6 [25.9;39.9]                       | 32.4 [27.2;39.1]              |
| Systolic BP, mmHg, median [IQR]                         | 132 [119;150]                          | 131 [120;151]                 | 132 [117;145]                          | 133 [122;144]                 |
| Diastolic BP, mmHg, median [IQR]                        | 77.0 [68.0;86.0]                       | 78.0 [69.0;87.0]              | 74.0 [63.0;89.0]                       | 79.0 [70.0;92.0]              |
| Baseline eGFR, ml/min/1.73m <sup>2</sup> , median [IQR] | 100.1 [89.1;110.2]                     | 97.3 [90.6;106.9]             | 95.8 [88.5;108.3]                      | 99.2 [91.6;113.8]             |

**Supplementary Table 2:** NIH All of Us Cohort Characteristics stratified by *APOL1* genotype.

|                                                       | No <i>APOL1</i> p.N264K alleles |                        | ≥1 <i>APOL1</i> p.N264K alleles |                        |
|-------------------------------------------------------|---------------------------------|------------------------|---------------------------------|------------------------|
|                                                       | <i>APOL1</i> Low Risk           | <i>APOL1</i> High Risk | <i>APOL1</i> Low Risk           | <i>APOL1</i> High Risk |
|                                                       | N=12,655                        | N=1952                 | N=608                           | N=97                   |
| Age, median [IQR], years                              | 54.8 [41.8–63.8]                | 53.8 [40.8–61.8]       | 55.8 [43.8–64.8]                | 55.8 [41.8–62.8]       |
| Male, n, (%)                                          | 4461 (35.2%)                    | 694 (35.6%)            | 210 (34.5%)                     | 34 (35.0%)             |
| Diabetes, n, (%)                                      | 3463 (27.4%)                    | 545 (27.9%)            | 159 (26.2%)                     | 20 (20.6%)             |
| Body Mass Index, median [IQR]                         | 30.8 [25.9 – 36.9]              | 31.3 [26.3 – 37.7]     | 30.3 [25.5 – 36.1]              | 30.2 [24.8 – 37.4]     |
| Systolic BP, mmHg, median [IQR]                       | 130.0 [119.5-139.0]             | 130.0 [120.0-140.0]    | 128.0 [120.0-138.0]             | 126.0 [117.0-137.0]    |
| Diastolic BP, mmHg, median [IQR]                      | 73.0 [79.0-85.0]                | 74.0 [79.0-86.0]       | 78.0 [73.0-84.25]               | 77.0 [73.0-83]         |
| Median eGFR, ml/min/1.73m <sup>2</sup> , median [IQR] | 89.1 [73.5–87.8]                | 86.2 [69.7–101.2]      | 88.9 [72.1–103.2]               | 88.9 [76.4 –101.2]     |

**Supplementary Table 3: ESRD definition**

| <b><i>Outcome</i></b>                 | <b><i>Definition</i></b>                                                                                                                                                                                                            |
|---------------------------------------|-------------------------------------------------------------------------------------------------------------------------------------------------------------------------------------------------------------------------------------|
| <b>1. ESRD</b>                        |                                                                                                                                                                                                                                     |
| a. eGFR <15 ml/min/1.73m <sup>2</sup> | An outpatient laboratory measurement of eGFR <15 ml/min/1.73 m <sup>2</sup> with confirmatory eGFR <15 at least 3 months apart                                                                                                      |
| b. dialysis                           | Either 2 outpatient codes for dialysis or 1 outpatient and 1 inpatient diagnosis code in primary position (at least 3 months apart)<br>Codes are listed in the dialysis codes table (supplemental table 3)                          |
| c. transplant                         | Either an outpatient code for renal transplant or an inpatient code position as the primary diagnosis. In the outpatient setting two codes are require in two different dates.<br>Codes include in the definition table (Table S9.) |



**Supplementary Table 4.** Definitions and procedure codes for dialysis and comorbidities.

| <b>Dialysis</b>     |                                                                                                                                                                                                                                                                                                                                                                                                                                                                                                                                                                                                                                                                                                                                                                                                                                                                                                                                                           |
|---------------------|-----------------------------------------------------------------------------------------------------------------------------------------------------------------------------------------------------------------------------------------------------------------------------------------------------------------------------------------------------------------------------------------------------------------------------------------------------------------------------------------------------------------------------------------------------------------------------------------------------------------------------------------------------------------------------------------------------------------------------------------------------------------------------------------------------------------------------------------------------------------------------------------------------------------------------------------------------------|
| ICD-9<br>Diagnosis  | V45.1, V45.11, V56.0, V56.1, V56.2, V56.8, 585.6, V45.12, V56.31, V56.32, 792.5, 39.95, 39.952, 54.982, 39.953, 54.98, 54.983, 99.78                                                                                                                                                                                                                                                                                                                                                                                                                                                                                                                                                                                                                                                                                                                                                                                                                      |
| ICD-10<br>diagnosis | N18.6 R88.0 Z49.31, Z49.32, Z91.15,3E1M39Z Z49.01, Z49.02, Z99.2                                                                                                                                                                                                                                                                                                                                                                                                                                                                                                                                                                                                                                                                                                                                                                                                                                                                                          |
| ICD9P C             | 39.951, 54.981                                                                                                                                                                                                                                                                                                                                                                                                                                                                                                                                                                                                                                                                                                                                                                                                                                                                                                                                            |
| CPT                 | 90941, 90942, 90943, 90944, G0491, G0492, M0916, M0920, M0931, M0932, 90996, A4690, A4750, A4755, 90935, 90937, 90947, 90999, 90988, 90997, 4054F, 4055F, E1590, G8715, G8727, M0936, 36516, 36901, 36902, 36903, 36904, 36905, 36906, 36516,36901,36902,36903,36904,36905,36906,36907,36908,36909,4052F,4053F,90939, 90940,90963,90964,90965,90966,90967,90968,90969,90970,90976,90977,90978,90979,90982,90983, 90984, 90985, 90991, 90994, 99512, 99559, G0257, G0320, G0321, G0322, G0323, G0327, G8075, G8076, G8714, G8956, G9264, G9265, G9266, M0923, M0928, M0937, M0940, M0944, M0945, M0948, M0952, M0956, S9335, S9339, G9240, G9241, 0505F,0507F,9092,90921,90924,90925,90951,90952,90953, 90954, 90955, 90956, 90957, 90958, 90959, 90960, 90961, 90962, 90989, 90990, 90992, 90993,90995, 90998, 4054F, 4055F                                                                                                                               |
| ICD-10              | E11.00, E11.01, E11.10, E11.11, E11.21, E11.22, E11.29, E11.311, E11.319, E11.321, E11.3211, E11.3212, E11.3213, E11.3219, E11.329, E11.3291, E11.3292, E11.3293, E11.3299, E11.331, E11.3311, E11.3312, E11.3313, E11.3319, E11.339, E11.3391, E11.3392, E11.3393, E11.3399, E11.341, E11.3411, E11.3412, E11.3413, E11.3419, E11.349, E11.3491, E11.3492, E11.3493, E11.3499, E11.351, E11.3511,E11.3512, E11.3513, E11.3519, E11.3521, E11.3522, E11.3523, E11.3529, E11.3531, E11.3532, E11.3533, E11.3539, E11.3541,E11.3542, E11.3543, E11.3549, E11.3551, E11.3552, E11.3553, E11.3559, E11.359, E11.3591, E11.3592, E11.3593, E11.3599, E11.36, E11.37X1, E11.37X2, E11.37X3, E11.37X9, E11.39, E11.40, E11.41, E11.42, E11.43, E11.44, E11.49, E11.51, E11.52, E11.59, E11.610, E11.618, E11.620, E11.621, E11.622,E11.628, E11.630, E11.638, E11.641, E11.649, E11.65, E11.69, E11.8, E11.9, O24.111, O24.112, O24.113, O24.119, O24.12, O24.13 |
| ICD9                | 250, 250.1, 250.2, 250.3, 250.4, 250.5, 250.6, 250.7, 250.8, 250.9, 357.2, 362.01, 362.02, 362.04, 362.05, 362.06, 362.07, 366.41, 648, 648.01, 648.03, 648.04                                                                                                                                                                                                                                                                                                                                                                                                                                                                                                                                                                                                                                                                                                                                                                                            |
| Hypertension        |                                                                                                                                                                                                                                                                                                                                                                                                                                                                                                                                                                                                                                                                                                                                                                                                                                                                                                                                                           |

|                    |                                                                                                                                                                                                                                                                                                                                                                                                                                                                                                                                                                                                                                                                                                                  |
|--------------------|------------------------------------------------------------------------------------------------------------------------------------------------------------------------------------------------------------------------------------------------------------------------------------------------------------------------------------------------------------------------------------------------------------------------------------------------------------------------------------------------------------------------------------------------------------------------------------------------------------------------------------------------------------------------------------------------------------------|
| ICD10              | I10., O10.011, O10.012, O10.013, O10.019, O10.02, O10.03, O10.911, O10.912, O10.913, O10.919, O10.92, O10.93, O16.1, O16.2, O16.3, O16.4, O16.5, O16.9                                                                                                                                                                                                                                                                                                                                                                                                                                                                                                                                                           |
| ICD-9              | 401,401.1,401.9,402,402.01,402.1,402.11,402.9,402.91,403,403.01,403.1,403.11, 403.9,403.91,404, 404.01, 404.02, 404.03, 404.1, 404.11, 404.12, 404.13, 404.9, 404.91, 404.92, 404.93, 405.01, 405.09, 405.11, 405.19, 405.91, 405.99, 437.2, 642, 642.01, 642.02, 642.03, 642.04, 642.1, 642.11, 642.12, 642.13, 642.14, 642.2, 642.21, 642.22, 642.23, 642.24, 642.3, 642.31, 642.32, 642.33, 642.34, 642.4, 642.41, 642.42, 642.43, 642.44, 642.5, 642.51, 642.52, 642.53, 642.54, 642.6, 642.61, 642.62, 642.63, 642.64, 642.7, 642.71, 642.72, 642.73, 642.74, 642.9, 642.91, 642.92, 642.93                                                                                                                 |
| Nephrotic Syndrome |                                                                                                                                                                                                                                                                                                                                                                                                                                                                                                                                                                                                                                                                                                                  |
| ICD10              | N04.0, N04.1, N04.2, N04.3, N04.4, N04.5, N04.6, N04.7, N04.8, N04.9                                                                                                                                                                                                                                                                                                                                                                                                                                                                                                                                                                                                                                             |
| ICD9               | 581.9                                                                                                                                                                                                                                                                                                                                                                                                                                                                                                                                                                                                                                                                                                            |
| FSGS               |                                                                                                                                                                                                                                                                                                                                                                                                                                                                                                                                                                                                                                                                                                                  |
| ICD10              | N04.1                                                                                                                                                                                                                                                                                                                                                                                                                                                                                                                                                                                                                                                                                                            |
| Diabetes           |                                                                                                                                                                                                                                                                                                                                                                                                                                                                                                                                                                                                                                                                                                                  |
| ICD10              | E11.311, E10.42, E11.319, E11.628, E11.69, E10.618, E10.9, E10.37X3, E10.37X2, E10.11, E10.638, E11.3493, E11.8, E10.319, E11.3592, E11.3391, E10.69, E11.10, E10.29, E10.37X9, E11.9, E10.621, E11.3492, E09.36, E11.3399, E11.11, E11.3591, E11.3299, E10.620, E11.638, E09.42, E10.10, E10.65, E11.3499, E11.01, E11.630, E10.630, E08.36, E10.51, E11.649, E11.621, E11.620, E11.39, E10.21, E10.8, E11.65, E11.51, E10.40, Z46.81, E11.3393, E10.39, E13.42, E11.3593, E10.641, E10.311, E11.36, E11.3292, E10.649, E11.3491, E11.622, E11.3291, E11.618, E11.3599, E10.36, E11.00, E08.42, E13.36, Z96.41, E11.29, E11.3293, E10.628, E11.40, E13.10, E10.622, E11.641, E10.37X1, E11.42, E11.3392, E11.21 |
| ICD9               | 250.1, 250.12, 250.21, 250.4, 250.41, 250.43, 250.5, 250.51, 250.6, 250.63, 250.72, 250.83, 250.93, 357.2, 362.03, 250, 250.22, 250.23, 250.3, 250.31, 250.53, 250.91, 362.01, 362.04, 362.06, 362.07, V53.91, 250.01, 250.03, 250.13, 250.2, 250.42, 250.52, 250.73, 250.82, 250.9, 250.92, 362.02, 362.05, 366.41, 250.11, 250.32, 250.33, 250.61, 250.62, 250.7, 250.71, 250.8, 250.81, V45.85 250.02                                                                                                                                                                                                                                                                                                         |
| Alport's           |                                                                                                                                                                                                                                                                                                                                                                                                                                                                                                                                                                                                                                                                                                                  |
| ICD10              | Q87.81                                                                                                                                                                                                                                                                                                                                                                                                                                                                                                                                                                                                                                                                                                           |
| ICD9               | 759.89                                                                                                                                                                                                                                                                                                                                                                                                                                                                                                                                                                                                                                                                                                           |
| ADPKD              |                                                                                                                                                                                                                                                                                                                                                                                                                                                                                                                                                                                                                                                                                                                  |
| ICD10              | Q61.2, Q61.3                                                                                                                                                                                                                                                                                                                                                                                                                                                                                                                                                                                                                                                                                                     |
| ICD9               | 753.12, 753.13                                                                                                                                                                                                                                                                                                                                                                                                                                                                                                                                                                                                                                                                                                   |

| Cancer |                                                                                                                                                                                                                                                                                                                                                                                                                                                                                                                                                                                                                                                                                                                                                                                                                                                                                                                                                                                                                                                                                                                                                                                                                                                                                                                                                                                                                                                                                                                                                                                                                                                                                                                                                                                                                                                                                                                                                                                                                                                                                                                                                                                                                                                                                                                                                                                                                                                                                                                                                                                                                                                                                                                                                                                                                                                                                                                                                                                                                                                                                                                                                                                                                                                                                                                                                                                                                                                                                                                                                                                                                                                                                                                                                                                                                                                                                                                                                                                                                                                                                                                                                                                                                                                                                                                                           |
|--------|-------------------------------------------------------------------------------------------------------------------------------------------------------------------------------------------------------------------------------------------------------------------------------------------------------------------------------------------------------------------------------------------------------------------------------------------------------------------------------------------------------------------------------------------------------------------------------------------------------------------------------------------------------------------------------------------------------------------------------------------------------------------------------------------------------------------------------------------------------------------------------------------------------------------------------------------------------------------------------------------------------------------------------------------------------------------------------------------------------------------------------------------------------------------------------------------------------------------------------------------------------------------------------------------------------------------------------------------------------------------------------------------------------------------------------------------------------------------------------------------------------------------------------------------------------------------------------------------------------------------------------------------------------------------------------------------------------------------------------------------------------------------------------------------------------------------------------------------------------------------------------------------------------------------------------------------------------------------------------------------------------------------------------------------------------------------------------------------------------------------------------------------------------------------------------------------------------------------------------------------------------------------------------------------------------------------------------------------------------------------------------------------------------------------------------------------------------------------------------------------------------------------------------------------------------------------------------------------------------------------------------------------------------------------------------------------------------------------------------------------------------------------------------------------------------------------------------------------------------------------------------------------------------------------------------------------------------------------------------------------------------------------------------------------------------------------------------------------------------------------------------------------------------------------------------------------------------------------------------------------------------------------------------------------------------------------------------------------------------------------------------------------------------------------------------------------------------------------------------------------------------------------------------------------------------------------------------------------------------------------------------------------------------------------------------------------------------------------------------------------------------------------------------------------------------------------------------------------------------------------------------------------------------------------------------------------------------------------------------------------------------------------------------------------------------------------------------------------------------------------------------------------------------------------------------------------------------------------------------------------------------------------------------------------------------------------------------------------|
| ICD10  | C00.1, C00.2, C00.3, C00.4, C00.5, C00.6, C00.8, C01., C02.0, C02.1, C02.2, C02.3, C02.4, C02.8, C02.9, C03.0, C03.1, C03.9, C04.0, C04.1, C04.8, C04.9, C05.0, C05.1, C05.2, C05.9, C06.0, C06.1, C06.2, C06.89, C06.9, C07., C08.0, C08.1, C08.9, C09.0, C09.1, C09.9, C10.0, C10.1, C10.2, C10.3, C10.4, C10.8, C10.9, C11.0, C11.1, C11.2, C11.3, C11.8, C11.9, C12., C13.0, C13.1, C13.2, C13.8, C13.9, C14.0, C14.2, C14.8, C15.3, C15.4, C15.5, C15.8, C15.9, C16.0, C16.1, C16.2, C16.3, C16.4, C16.5, C16.6, C16.8, C16.9, C17.0, C17.1, C17.2, C17.3, C17.8, C17.9, C18.0, C18.1, C18.2, C18.3, C18.4, C18.5, C18.6, C18.7, C18.8, C18.9, C19., C20., C21.0, C21.1, C21.8, C22.0, C22.1, C22.2, C22.7, C22.8, C22.9, C23., C24.0, C24.1, C24.8, C24.9, C25.0, C25.1, C25.2, C25.3, C25.4, C25.7, C25.8, C25.9, C26.0, C26.1, C26.9, C30.0, C30.1, C31.0, C31.1, C31.2, C31.3, C31.8, C31.9, C32.0, C32.1, C32.2, C32.3, C32.8, C32.9, C33., C34.00, C34.10, C34.2, C34.30, C34.80, C34.90, C37., C38.0, C38.1, C38.2, C38.3, C38.4, C38.8, C39.0, C39.9, C40.00, C40.10, C40.20, C40.30, C41.0, C41.1, C41.2, C41.3, C41.4, C41.9, C43.0, C43.10, C43.20, C43.30, C43.31, C43.39, C43.4, C43.59, C43.60, C43.70, C43.8, C43.9, C46.0, C46.1, C46.2, C46.3, C46.4, C46.50, C46.7, C46.9, C47.8, C48.0, C48.1, C48.2, C48.8, C49.0, C49.10, C49.20, C49.3, C49.4, C49.5, C49.6, C49.8, C49.9, C49.A0, C49.A1, C49.A2, C49.A3, C49.A4, C49.A5, C49.A9, C4A.0, C4A.10, C4A.20, C4A.30, C4A.39, C4A.4, C4A.59, C4A.60, C4A.70, C4A.8, C4A.9, C50.019, C50.029, C50.119, C50.219, C50.319, C50.419, C50.519, C50.619, C50.819, C50.919, C50.929, C51.0, C51.1, C51.2, C51.9, C52., C53.0, C53.1, C53.8, C53.9, C54.0, C54.1, C54.2, C54.3, C54.8, C54.9, C55., C56.9, C57.00, C57.10, C57.20, C57.3, C57.4, C57.7, C57.8, C57.9, C58., C60.0, C60.1, C60.2, C60.8, C60.9, C61., C62.00, C62.10, C62.90, C63.00, C63.10, C63.2, C63.7, C63.8, C63.9, C64.9, C65.9, C66.9, C67.0, C67.1, C67.2, C67.3, C67.4, C67.5, C67.6, C67.7, C67.8, C67.9, C68.0, C68.1, C68.8, C68.9, C69.00, C69.10, C69.20, C69.30, C69.40, C69.50, C69.60, C69.80, C69.90, C70.0, C70.1, C70.9, C71.0, C71.1, C71.2, C71.3, C71.4, C71.5, C71.6, C71.7, C71.8, C71.9, C72.0, C72.1, C72.50, C72.9, C73., C74.90, C75.0, C75.1, C75.2, C75.3, C75.4, C75.5, C75.8, C75.9, C76.0, C76.1, C76.2, C76.3, C76.40, C76.50, C76.8, C77.0, C77.1, C77.2, C77.3, C77.4, C77.5, C77.8, C77.9, C78.00, C78.1, C78.2, C78.39, C78.4, C78.5, C78.6, C78.7, C78.89, C79.00, C79.11, C79.19, C79.2, C79.31, C79.32, C79.49, C79.51, C79.52, C79.60, C79.70, C79.81, C79.82, C79.89, C7A.00, C7A.010, C7A.011, C7A.012, C7A.019, C7A.020, C7A.021, C7A.022, C7A.023, C7A.024, C7A.025, C7A.026, C7A.029, C7A.090, C7A.091, C7A.092, C7A.093, C7A.094, C7A.094, C7A.095, C7A.095, C7A.096, C7A.096, C7A.098, C7A.1, C7B.00, C7B.01, C7B.02, C7B.03, C7B.04, C7B.09, C7B.1, C7B.8, C80.0, C80.1, C80.2, C81.00, C81.01, C81.02, C81.03, C81.04, C81.05, C81.06, C81.07, C81.08, C81.09, C81.10, C81.10, C81.11, C81.11, C81.12, C81.12, C81.13, C81.13, C81.14, C81.14, C81.15, C81.15, C81.16, C81.16, C81.17, C81.17, C81.18, C81.18, C81.19, C81.19, C81.20, C81.20, C81.21, C81.21, C81.22, C81.22, C81.23, C81.23, C81.24, C81.24, C81.25, C81.25, C81.26, C81.26, C81.27, C81.27, C81.28, C81.28, C81.29, C81.29, C81.30, C81.30, C81.31, C81.31, C81.32, C81.32, C81.33, C81.33, C81.34, C81.34, C81.35, C81.35, C81.36, C81.36, C81.37, C81.37, C81.38, C81.38, C81.39, C81.39, C81.40, C81.40, C81.41, C81.41, C81.42, C81.42, C81.43, C81.43, C81.44, C81.44, C81.45, C81.45, C81.46, C81.46, C81.47, C81.47, C81.48, C81.48, C81.49, C81.49, C81.70, C81.70, C81.71, C81.71, C81.72, C81.72, C81.73, C81.73, C81.74, C81.74, C81.75, C81.75, C81.76, C81.76, C81.77, C81.77, C81.78, C81.78, C81.79, C81.79, C81.90, C81.91, C81.92, C81.93, C81.94, C81.95, C81.96, C81.97, C81.98, C81.99, C82.90, C82.91, C82.92, C82.93, C82.94, C82.95, C82.96, C82.97, C82.98, C82.99, C83.10, C83.11, C83.12, C83.13, C83.14, C83.15, C83.16, C83.17, C83.18, C83.19, C83.30, C83.31, C83.32, C83.33, C83.34, C83.35, C83.36, C83.37, C83.38, C83.39, C83.50, C83.51, C83.52, C83.53, C83.54, C83.55, C83.56, C83.57, C83.58, C83.59, C83.70, C83.71, C83.72, C83.73, C83.74, |

C83.75, C83.76, C83.77, C83.78, C83.79, C83.80, C83.81, C83.82, C83.83, C83.84, C83.85, C83.86, C83.87, C83.88, C83.89, C84.00, C84.01, C84.02, C84.03, C84.04, C84.05, C84.06, C84.07, C84.08, C84.09, C84.10, C84.11, C84.12, C84.13, C84.14, C84.15, C84.16, C84.17, C84.18, C84.19, C84.40, C84.41, C84.42, C84.43, C84.44, C84.45, C84.46, C84.47, C84.48, C84.49, C84.60, C84.61, C84.62, C84.63, C84.64, C84.65, C84.66, C84.67, C84.68, C84.69, C84.70, C84.71, C84.72, C84.73, C84.74, C84.75, C84.76, C84.77, C84.78, C84.79, C84.93, C85.80, C85.81, C85.82, C85.83, C85.84, C85.85, C85.86, C85.87, C85.88, C85.89, C88.8, C90.00, C90.01, C90.02, C90.10, C90.11, C90.12, C90.20, C90.21, C90.22, C90.30, C90.31, C90.32, C91.00, C91.01, C91.02, C91.10, C91.11, C91.12, C91.40, C91.41, C91.90, C91.91, C91.92, C91.Z0, C91.Z1, C91.Z2, C92.00, C92.01, C92.02, C92.10, C92.11, C92.12, C92.20, C92.21, C92.22, C92.30, C92.31, C92.32, C92.40, C92.41, C92.42, C92.50, C92.51, C92.52, C92.90, C92.91, C92.92, C92.Z0, C92.Z1, C92.Z2, C93.00, C93.01, C93.02, C93.10, C93.11, C93.12, C93.90, C93.91, C93.92, C93.Z0, C93.Z1, C93.Z2, C94.00, C94.01, C94.02, C94.20, C94.21, C94.22, C94.30, C94.31, C94.32, C94.40, C94.41, C94.42, C94.80, C94.81, C94.82, C95.00, C95.01, C95.02, C95.10, C95.11, C95.12, C95.90, C95.91, C95.92, C96.0, C96.20, C96.21, C96.22, C96.29, C96.4, C96.9, C96.A, C96.Z, D00.00, D00.01, D00.02, D00.03, D00.04, D00.05, D00.06, D00.07, D00.08, D00.1, D00.2, D01.0, D01.1, D01.2, D01.3, D01.40, D01.49, D01.5, D01.7, D01.9, D02.0, D02.1, D02.20, D02.3, D02.4, D03.0, D03.10, D03.11, D03.12, D03.20, D03.21, D03.22, D03.30, D03.39, D03.4, D03.51, D03.52, D03.59, D03.60, D03.61, D03.62, D03.70, D03.71, D03.72, D03.8, D03.9, D05.90, D06.9, D07.0, D07.1, D07.2, D07.30, D07.39, D07.4, D07.5, D07.60, D07.69, D09.0, D09.10, D09.19, D09.20, D09.3, D09.8, D09.9, D22.9, D45., D46.0, D46.1, D46.20, D46.21, D46.22, D46.9, D46.A, D46.B, D46.C, D47.01, D47.02, D47.09, D47.1, D47.3, D47.9, D47.Z1, D47.Z2, D47.Z9, Q85.00, Q85.01, Q85.02, Q85.03, Q85.09

|      |                                                                                                                                                                                                                                                                                                                                                                                                                                                                                                                                                                                                                                                                                                                                                                                                                                                                                                                                                                                                                                                                                                                                                                                                                                                                                                                                                                                                                                                                                                                                                                                                                                                                                                                                                                                                                                                                                                                                                                                                                                                                                                                                                                                                                                                                                                                                                                                                                                                                                                                                                                                                                                                                                                                                                                                                                                                                                                                                                                                                                                                                                                                                                                                                                                                                                                                                                                                                                                                                                                                                                                                                                                                                                                                                                                                                                                                                                                                                                                                                                                                                                                                                                                                                                                                                                                                                                                                                                                                                                                                                                                                                                    |
|------|--------------------------------------------------------------------------------------------------------------------------------------------------------------------------------------------------------------------------------------------------------------------------------------------------------------------------------------------------------------------------------------------------------------------------------------------------------------------------------------------------------------------------------------------------------------------------------------------------------------------------------------------------------------------------------------------------------------------------------------------------------------------------------------------------------------------------------------------------------------------------------------------------------------------------------------------------------------------------------------------------------------------------------------------------------------------------------------------------------------------------------------------------------------------------------------------------------------------------------------------------------------------------------------------------------------------------------------------------------------------------------------------------------------------------------------------------------------------------------------------------------------------------------------------------------------------------------------------------------------------------------------------------------------------------------------------------------------------------------------------------------------------------------------------------------------------------------------------------------------------------------------------------------------------------------------------------------------------------------------------------------------------------------------------------------------------------------------------------------------------------------------------------------------------------------------------------------------------------------------------------------------------------------------------------------------------------------------------------------------------------------------------------------------------------------------------------------------------------------------------------------------------------------------------------------------------------------------------------------------------------------------------------------------------------------------------------------------------------------------------------------------------------------------------------------------------------------------------------------------------------------------------------------------------------------------------------------------------------------------------------------------------------------------------------------------------------------------------------------------------------------------------------------------------------------------------------------------------------------------------------------------------------------------------------------------------------------------------------------------------------------------------------------------------------------------------------------------------------------------------------------------------------------------------------------------------------------------------------------------------------------------------------------------------------------------------------------------------------------------------------------------------------------------------------------------------------------------------------------------------------------------------------------------------------------------------------------------------------------------------------------------------------------------------------------------------------------------------------------------------------------------------------------------------------------------------------------------------------------------------------------------------------------------------------------------------------------------------------------------------------------------------------------------------------------------------------------------------------------------------------------------------------------------------------------------------------------------------------------------------|
| ICD9 | 140.1, 140.3, 140.4, 140.5, 140.6, 140.8, 140.9, 141, 141.1, 141.2, 141.3, 141.4, 141.5,<br>141.6, 141.8, 141.9, 142, 142.1, 142.2, 142.8, 142.9, 143, 143.1, 143.8, 143.9, 144, 144.1,<br>144.8, 144.9, 145, 145.1, 145.2, 145.3, 145.4, 145.5, 145.6, 145.8, 145.9, 146, 146.1, 146.2,<br>146.3, 146.4, 146.5, 146.6, 146.7, 146.8, 146.9, 147, 147.1, 147.2, 147.3, 147.8, 147.9, 148,<br>148.1, 148.2, 148.3, 148.8, 148.9, 149, 149.1, 149.8, 149.9, 150, 150.1, 150.2, 150.3, 150.4,<br>150.5, 150.8, 150.9, 151, 151.1, 151.2, 151.3, 151.4, 151.5, 151.6, 151.8, 151.9, 152, 152.1,<br>152.2, 152.3, 152.8, 152.9, 153, 153.1, 153.2, 153.3, 153.4, 153.5, 153.6, 153.7, 153.8,<br>153.9, 154, 154.1, 154.2, 154.3, 154.8, 155, 155.1, 155.2, 156, 156.1, 156.2, 156.8, 156.9,<br>157, 157.1, 157.2, 157.3, 157.4, 157.8, 157.9, 158, 158.8, 158.9, 159, 159.1, 159.8, 159.9,<br>160, 160.1, 160.2, 160.3, 160.4, 160.5, 160.8, 160.9, 161, 161.1, 161.2, 161.3, 161.8, 161.9,<br>162, 162.2, 162.3, 162.4, 162.5, 162.8, 162.9, 163, 163.1, 163.8, 163.9, 164, 164.1, 164.2,<br>164.3, 164.8, 164.9, 165, 165.8, 165.9, 170, 170.1, 170.2, 170.3, 170.4, 170.5, 170.6, 170.7,<br>170.8, 170.9, 171, 171.2, 171.3, 171.4, 171.5, 171.6, 171.7, 171.8, 171.9, 172, 172.1, 172.2,<br>172.3, 172.4, 172.5, 172.6, 172.7, 172.8, 172.9, 174, 174.1, 174.2, 174.3, 174.4, 174.5,<br>174.6, 174.8, 174.9, 175, 175.9, 176, 176.1, 176.2, 176.3, 176.4, 176.5, 176.8, 176.9, 179,<br>180, 180.1, 180.8, 180.9, 181, 182, 182.1, 182.8, 183, 183.2, 183.3, 183.4, 183.5, 183.8,<br>183.9, 184, 184.1, 184.2, 184.3, 184.4, 184.8, 184.9, 185, 186, 186.9, 187.1, 187.2, 187.3,<br>187.4, 187.5, 187.6, 187.7, 187.8, 187.9, 188, 188.1, 188.2, 188.3, 188.4, 188.5, 188.6,<br>188.7, 188.8, 188.9, 189, 189.1, 189.2, 189.3, 189.4, 189.8, 189.9, 190, 190.1, 190.2, 190.3,<br>190.4, 190.5, 190.6, 190.7, 190.8, 190.9, 191, 191.1, 191.2, 191.3, 191.4, 191.5, 191.6,<br>191.7, 191.8, 191.9, 192, 192.1, 192.2, 192.3, 192.8, 192.9, 193, 194, 194.1, 194.3, 194.4,<br>194.5, 194.6, 194.8, 194.9, 195, 195.1, 195.2, 195.3, 195.4, 195.5, 195.8, 196, 196.1, 196.2,<br>196.3, 196.5, 196.6, 196.8, 196.9, 197, 197.1, 197.2, 197.3, 197.4, 197.5, 197.6, 197.7,<br>197.8, 198, 198.1, 198.2, 198.3, 198.4, 198.5, 198.6, 198.7, 198.81, 198.82, 198.89, 199,<br>199.1, 199.2, 200, 200.01, 200.02, 200.03, 200.04, 200.05, 200.06, 200.07, 200.08, 200.1,<br>200.11, 200.12, 200.13, 200.14, 200.15, 200.16, 200.17, 200.18, 200.2, 200.21, 200.22,<br>200.23, 200.24, 200.25, 200.26, 200.27, 200.28, 200.3, 200.31, 200.32, 200.33, 200.34,<br>200.35, 200.36, 200.37, 200.38, 200.4, 200.41, 200.42, 200.43, 200.44, 200.45, 200.46,<br>200.47, 200.48, 200.5, 200.51, 200.52, 200.53, 200.54, 200.55, 200.56, 200.57, 200.58,<br>200.6, 200.61, 200.62, 200.63, 200.64, 200.65, 200.66, 200.67, 200.68, 200.7, 200.71,<br>200.72, 200.73, 200.74, 200.75, 200.76, 200.77, 200.78, 200.8, 200.81, 200.82, 200.83,<br>200.84, 200.85, 200.86, 200.87, 200.88, 201, 201.01, 201.02, 201.03, 201.04, 201.05,<br>201.06, 201.07, 201.08, 201.1, 201.11, 201.12, 201.13, 201.14, 201.15, 201.16, 201.17,<br>201.18, 201.2, 201.21, 201.22, 201.23, 201.24, 201.25, 201.26, 201.27, 201.28, 201.4,<br>201.41, 201.42, 201.43, 201.44, 201.45, 201.46, 201.47, 201.48, 201.5, 201.51, 201.52,<br>201.53, 201.54, 201.55, 201.56, 201.57, 201.58, 201.6, 201.61, 201.62, 201.63, 201.64,<br>201.65, 201.66, 201.67, 201.68, 201.7, 201.71, 201.72, 201.73, 201.74, 201.75, 201.76,<br>201.77, 201.78, 201.9, 201.91, 201.92, 201.93, 201.94, 201.95, 201.96, 201.97, 201.98,<br>202, 202.01, 202.02, 202.03, 202.04, 202.05, 202.06, 202.07, 202.08, 202.1, 202.11,<br>202.12, 202.13, 202.14, 202.15, 202.16, 202.17, 202.18, 202.2, 202.21, 202.22, 202.23,<br>202.24, 202.25, 202.26, 202.27, 202.28, 202.3, 202.31, 202.32, 202.33, 202.34, 202.35,<br>202.36, 202.37, 202.38, 202.4, 202.41, 202.42, 202.43, 202.44, 202.45, 202.46, 202.47,<br>202.48, 202.48, 202.5, 202.51, 202.52, 202.53, 202.54, 202.55, 202.56, 202.57, 202.58,<br>202.6, 202.61, 202.62, 202.63, 202.64, 202.65, 202.66, 202.67, 202.68, 202.7, 202.71,<br>202.72, 202.73, 202.74, 202.75, 202.76, 202.77, 202.78, 202.8, 202.81, 202.82, 202.83,<br>202.84, 202.85, 202.86, 202.87, 202.88, 202.9, 202.91, 202.92, 202.93, 202.94, 202.95,<br>202.96, 202.97, 202.98, 203, 203, 203, 203.01, 203.02, 203.1, 203.1, 203.1, 203.11, 203.12,<br>203.8, 203.8, 203.8, 203.81, 203.82, 204, 204, 204, 204.01, 204.02, 204.1, 204.1, 204.1, |
|------|--------------------------------------------------------------------------------------------------------------------------------------------------------------------------------------------------------------------------------------------------------------------------------------------------------------------------------------------------------------------------------------------------------------------------------------------------------------------------------------------------------------------------------------------------------------------------------------------------------------------------------------------------------------------------------------------------------------------------------------------------------------------------------------------------------------------------------------------------------------------------------------------------------------------------------------------------------------------------------------------------------------------------------------------------------------------------------------------------------------------------------------------------------------------------------------------------------------------------------------------------------------------------------------------------------------------------------------------------------------------------------------------------------------------------------------------------------------------------------------------------------------------------------------------------------------------------------------------------------------------------------------------------------------------------------------------------------------------------------------------------------------------------------------------------------------------------------------------------------------------------------------------------------------------------------------------------------------------------------------------------------------------------------------------------------------------------------------------------------------------------------------------------------------------------------------------------------------------------------------------------------------------------------------------------------------------------------------------------------------------------------------------------------------------------------------------------------------------------------------------------------------------------------------------------------------------------------------------------------------------------------------------------------------------------------------------------------------------------------------------------------------------------------------------------------------------------------------------------------------------------------------------------------------------------------------------------------------------------------------------------------------------------------------------------------------------------------------------------------------------------------------------------------------------------------------------------------------------------------------------------------------------------------------------------------------------------------------------------------------------------------------------------------------------------------------------------------------------------------------------------------------------------------------------------------------------------------------------------------------------------------------------------------------------------------------------------------------------------------------------------------------------------------------------------------------------------------------------------------------------------------------------------------------------------------------------------------------------------------------------------------------------------------------------------------------------------------------------------------------------------------------------------------------------------------------------------------------------------------------------------------------------------------------------------------------------------------------------------------------------------------------------------------------------------------------------------------------------------------------------------------------------------------------------------------------------------------------------------------------------|

204.11, 204.12, 204.2, 204.2, 204.2, 204.21, 204.22, 204.8, 204.8, 204.8, 204.81, 204.82, 204.9, 204.9, 204.9, 204.91, 204.92, 205, 205, 205, 205.01, 205.02, 205.1, 205.1, 205.1, 205.11, 205.12, 205.2, 205.2, 205.2, 205.21, 205.22, 205.3, 205.3, 205.3, 205.31, 205.32, 205.8, 205.8, 205.8, 205.81, 205.82, 205.9, 205.9, 205.9, 205.91, 205.92, 206, 206, 206, 206.01, 206.02, 206.1, 206.1, 206.1, 206.11, 206.12, 206.2, 206.2, 206.2, 206.21, 206.22, 206.8, 206.8, 206.8, 206.81, 206.82, 206.9, 206.9, 206.9, 206.91, 206.92, 207, 207, 207, 207.01, 207.02, 207.1, 207.1, 207.1, 207.11, 207.12, 207.2, 207.2, 207.2, 207.21, 207.22, 207.8, 207.8, 207.8, 207.81, 207.82, 208, 208, 208, 208.01, 208.02, 208.1, 208.1, 208.1, 208.11, 208.12, 208.2, 208.2, 208.2, 208.21, 208.22, 208.8, 208.8, 208.8, 208.81, 208.82, 208.9, 208.9, 208.9, 208.91, 208.92, 209, 209.01, 209.02, 209.03, 209.1, 209.11, 209.12, 209.13, 209.14, 209.15, 209.16, 209.17, 209.2, 209.21, 209.22, 209.23, 209.24, 209.25, 209.26, 209.27, 209.29, 209.3, 209.31, 209.32, 209.33, 209.34, 209.35, 209.36, 209.7, 209.71, 209.72, 209.73, 209.74, 209.75, 209.79, 230, 230.1, 230.2, 230.3, 230.4, 230.5, 230.6, 230.7, 230.8, 230.9, 231, 231.1, 231.2, 231.8, 231.9, 232, 232.1, 232.2, 232.3, 232.4, 232.5, 232.6, 232.7, 232.8, 232.9, 233, 233.1, 233.2, 233.3, 233.3, 233.31, 233.32, 233.39, 233.4, 233.5, 233.6, 233.7, 233.9, 234, 234.8, 234.9, 237.7, 237.7, 237.71, 237.72, 237.73, 237.79, 238.4, 238.71, 238.72, 238.73, 238.74, 238.75, 238.76, 238.77, 238.79

**Supplementary Table 5:** MVP *APOL1* association with chronic kidney disease. The risk of CKD associate with *APOL1* high risk variants (*APOL1* HR) is not observed in the presence of *APOL1* N264K+ and is comparable to *APOL1* low risk (*APOL1* LR).

| <i>Predictors</i>                  | <b>Non-diabetic</b> |             |                  | <b>Diabetic</b>    |             |                  |
|------------------------------------|---------------------|-------------|------------------|--------------------|-------------|------------------|
|                                    | <i>Odds Ratios</i>  | <i>CI</i>   | <i>p</i>         | <i>Odds Ratios</i> | <i>CI</i>   | <i>p</i>         |
| <b>Model 1</b>                     |                     |             |                  |                    |             |                  |
| <i>APOL1</i> HR, N264K-            | 1.72                | 1.60 – 1.84 | <b>&lt;0.001</b> | 1.31               | 1.22 – 1.41 | <b>&lt;0.001</b> |
| <i>APOL1</i> LR, N264K+            | 0.86                | 0.74 – 0.99 | 0.031            | 1.02               | 0.90 – 1.16 | 0.716            |
| <i>APOL1</i> HR, N264K+            | 0.71                | 0.46 – 1.09 | <b>0.113</b>     | 0.75               | 0.52 – 1.08 | <b>0.125</b>     |
| <b>Model 2</b>                     |                     |             |                  |                    |             |                  |
| <i>APOL1</i> HR, N264K-            | 1.73                | 1.61 – 1.86 | <b>&lt;0.001</b> | 1.31               | 1.22 – 1.41 | <b>&lt;0.001</b> |
| <i>APOL1</i> LR, N264K+            | 0.87                | 0.75 – 1.00 | 0.052            | 1.03               | 0.90 – 1.17 | 0.704            |
| <i>APOL1</i> HR, N264K+            | 0.69                | 0.45 – 1.07 | <b>0.095</b>     | 0.74               | 0.51 – 1.07 | <b>0.106</b>     |
| <b>Model 3</b>                     |                     |             |                  |                    |             |                  |
| <i>APOL1</i> HR, N264K-            | 1.72                | 1.60 – 1.85 | <b>&lt;0.001</b> | 1.31               | 1.21 – 1.41 | <b>&lt;0.001</b> |
| <i>APOL1</i> LR, N264K+            | 0.86                | 0.75 – 1.00 | 0.045            | 1.03               | 0.91 – 1.18 | 0.624            |
| <i>APOL1</i> HR, N264K+            | 0.70                | 0.45 – 1.08 | <b>0.102</b>     | 0.73               | 0.51 – 1.06 | <b>0.101</b>     |
| <b>Model 4</b>                     |                     |             |                  |                    |             |                  |
| <i>APOL1</i> HR, N264K-            | 1.74                | 1.62 – 1.87 | <b>&lt;0.001</b> | 1.32               | 1.22 – 1.42 | <b>&lt;0.001</b> |
| <i>APOL1</i> LR, N264K+            | 0.86                | 0.75 – 0.99 | 0.041            | 1.04               | 0.91 – 1.18 | 0.581            |
| <i>APOL1</i> HR, N264K+            | 0.70                | 0.45 – 1.08 | <b>0.104</b>     | 0.74               | 0.51 – 1.08 | <b>0.116</b>     |
| <b>Model 5</b>                     |                     |             |                  |                    |             |                  |
| <i>APOL1</i> HR, N264K-            | 1.72                | 1.60 – 1.85 | <b>&lt;0.001</b> | 1.32               | 1.22 – 1.42 | <b>&lt;0.001</b> |
| <i>APOL1</i> LR, N264K+            | 0.85                | 0.74 – 0.99 | 0.033            | 1.04               | 0.91 – 1.18 | 0.559            |
| <i>APOL1</i> HR, N264K+            | 0.71                | 0.46 – 1.10 | <b>0.127</b>     | 0.74               | 0.51 – 1.07 | <b>0.109</b>     |
| <b>APOL1 HR: N264K Interaction</b> |                     |             |                  |                    |             |                  |
| <b>Model 1</b>                     |                     |             | <b>0.002</b>     |                    |             | <b>0.004</b>     |
| <b>Model 2</b>                     |                     |             | <b>0.001</b>     |                    |             | <b>0.003</b>     |
| <b>Model 3</b>                     |                     |             | <b>0.001</b>     |                    |             | <b>0.003</b>     |
| <b>Model 4</b>                     |                     |             | <b>0.001</b>     |                    |             | <b>0.004</b>     |
| <b>Model 5</b>                     |                     |             | <b>0.002</b>     |                    |             | <b>0.002</b>     |

Logistic regression was used to evaluate the association of *APOL1* high-risk and p.N264K allele genotype and CKD. Odds ratios were adjusted for: model 1: age, gender, 10 principal components of ancestry, model 2: Also adjust for body mass index and renin angiotensin aldosterone system inhibition (use of angiotensin converting enzyme or renin angiotensin aldosterone blocker) and model 3: Further adjust for diagnosis of hypertension. Model 4: adjusted for cancer (excluding non-melanoma skin cancers) and Model 5: adjusted for adult polycystic kidney disease (ADPKD).

All odds ratios are displayed relative to *APOL1* low-risk genotype (LR), and N264K-. *APOL1* high-risk refers to 2 copies of the *APOL1* High Risk mutations G1 or G2 or G1 and G2; *APOL1* LR, 0 or 1 total copy of the G1 or G2 High Risk mutation; N264K+, carrying 1 or 2 copies of *APOL1* p.N264K; N264K-, carrying 0 copies of *APOL1* N264K.

**Supplementary Table 6:** MVP *APOL1* association with End Stage Kidney Disease. The risk of ESKD associate with *APOL1* high risk variants (*APOL1* HR) is not observed in the presence of *APOL1* N264K+ and is comparable to *APOL1* low risk (*APOL1* LR).

| <i>Predictors</i>                         | <b>Non-diabetic</b> |             |                  | <b>Diabetic</b>    |             |                  |
|-------------------------------------------|---------------------|-------------|------------------|--------------------|-------------|------------------|
|                                           | <i>Odds Ratios</i>  | <i>CI</i>   | <i>p</i>         | <i>Odds Ratios</i> | <i>CI</i>   | <i>p</i>         |
| <b>Model 1</b>                            |                     |             |                  |                    |             |                  |
| <i>APOL1</i> HR, N264K-                   | 4.00                | 3.58 – 4.48 | <b>&lt;0.001</b> | 1.83               | 1.66 – 2.03 | <b>&lt;0.001</b> |
| <i>APOL1</i> LR, N264K+                   | 0.88                | 0.63 – 1.22 | 0.439            | 1.04               | 0.84 – 1.28 | 0.718            |
| <i>APOL1</i> HR, N264K+                   | 0.74                | 0.27 – 1.98 | <b>0.548</b>     | 0.82               | 0.43 – 1.55 | 0.545            |
| <b>Model 2</b>                            |                     |             |                  |                    |             |                  |
| <i>APOL1</i> HR, N264K-                   | 4.03                | 3.60 – 4.51 | <b>&lt;0.001</b> | 1.85               | 1.67 – 2.04 | <b>&lt;0.001</b> |
| <i>APOL1</i> LR, N264K+                   | 0.89                | 0.64 – 1.23 | 0.482            | 1.04               | 0.85 – 1.29 | 0.688            |
| <i>APOL1</i> HR, N264K+                   | 0.73                | 0.27 – 1.95 | <b>0.525</b>     | 0.82               | 0.43 – 1.56 | 0.55             |
| <b>Model 3</b>                            |                     |             |                  |                    |             |                  |
| <i>APOL1</i> HR, N264K-                   | 3.94                | 3.52 – 4.41 | <b>&lt;0.001</b> | 1.84               | 1.66 – 2.04 | <b>&lt;0.001</b> |
| <i>APOL1</i> LR, N264K+                   | 0.88                | 0.63 – 1.22 | 0.439            | 1.05               | 0.85 – 1.30 | 0.628            |
| <i>APOL1</i> HR, N264K+                   | 0.73                | 0.27 – 1.96 | <b>0.530</b>     | 0.82               | 0.43 – 1.56 | 0.553            |
| <b>Model 4</b>                            |                     |             |                  |                    |             |                  |
| <i>APOL1</i> HR, N264K-                   | 3.89                | 3.47 – 4.35 | <b>&lt;0.001</b> | 1.84               | 1.66 – 2.03 | <b>&lt;0.001</b> |
| <i>APOL1</i> LR, N264K+                   | 0.88                | 0.64 – 1.23 | 0.461            | 1.05               | 0.85 – 1.30 | 0.638            |
| <i>APOL1</i> HR, N264K+                   | 0.73                | 0.27 – 1.98 | <b>0.540</b>     | 0.83               | 0.44 – 1.57 | 0.563            |
| <b>Model 5</b>                            |                     |             |                  |                    |             |                  |
| <i>APOL1</i> HR, N264K-                   | 3.88                | 3.46 – 4.35 | <b>&lt;0.001</b> | 1.83               | 1.66 – 2.03 | <b>&lt;0.001</b> |
| <i>APOL1</i> LR, N264K+                   | 0.84                | 0.60 – 1.18 | 0.322            | 1.06               | 0.85 – 1.30 | 0.619            |
| <i>APOL1</i> HR, N264K+                   | 0.72                | 0.26 – 1.96 | <b>0.517</b>     | 0.82               | 0.43 – 1.56 | 0.546            |
| <b><i>APOL1</i> HR: N264K Interaction</b> |                     |             |                  |                    |             |                  |
| Model 1                                   |                     |             | <b>0.003</b>     |                    |             | <b>0.015</b>     |
| Model 2                                   |                     |             | <b>0.003</b>     |                    |             | <b>0.014</b>     |
| Model 3                                   |                     |             | <b>0.003</b>     |                    |             | <b>0.014</b>     |
| Model 4                                   |                     |             | <b>0.004</b>     |                    |             | <b>0.015</b>     |
| Model 5                                   |                     |             | <b>0.005</b>     |                    |             | <b>0.013</b>     |

Logistic regression was used to evaluate the association of *APOL1* high-risk and p.N264K allele genotype and ESKD. Odds ratios were adjusted for: model 1: age, gender, 10 principal components of ancestry, model 2: Also adjust for body mass index and renin angiotensin aldosterone system inhibition (use of angiotensin converting enzyme or renin angiotensin aldosterone blocker) and model 3: Further adjust for diagnosis of hypertension. Model 4: adjusted for the diagnosis of cancer (excluding non-melanoma skin cancers) and Model 5: adjusted for adult polycystic kidney disease (ADPKD).

All odds ratios are displayed relative to *APOL1* low-risk genotype (LR), and N264K-. *APOL1* high-risk refers to 2 copies of the *APOL1* High Risk mutations G1 or G2 or G1 and G2; *APOL1* LR, 0 or 1 total copy of the G1 or G2 High Risk mutation; N264K+, carrying 1 or 2 copies of *APOL1* p.N264K; N264K-, carrying 0 copies of *APOL1* N264K.



**Supplementary Table 7. MVP Cohort Characteristics stratified by APOL1 N264K genotype.**

|                          | All patients      |                    |                                 |                             | APOL1 high risk patients |                   |                                |                            |
|--------------------------|-------------------|--------------------|---------------------------------|-----------------------------|--------------------------|-------------------|--------------------------------|----------------------------|
|                          | [ALL]<br>N=121492 | N264K-<br>N=116238 | N264K<br>Heterozygous<br>N=5200 | N264K<br>Homozygous<br>N=54 | [ALL]<br>N=15604         | N264K-<br>N=15022 | N264K<br>Heterozygous<br>N=579 | N264K<br>Homozygous<br>N=3 |
| apol1_ht:                |                   |                    |                                 |                             |                          |                   |                                |                            |
| LR_N264K-                | 101216 (83.3%)    | 101216 (87.1%)     | 0 (0.00%)                       | 0 (0.00%)                   |                          |                   |                                |                            |
| HR_N264K-                | 15022 (12.4%)     | 15022 (12.9%)      | 0 (0.00%)                       | 0 (0.00%)                   | 15022 (96.3%)            | 15022 (100%)      | 0 (0.00%)                      | 0 (0.00%)                  |
| LR_N264K+                | 4672 (3.85%)      | 0 (0.00%)          | 4621 (88.9%)                    | 51 (94.4%)                  |                          |                   |                                |                            |
| HR_N264K+                | 582 (0.48%)       | 0 (0.00%)          | 579 (11.1%)                     | 3 (5.56%)                   | 582 (3.73%)              | 0 (0.00%)         | 579 (100%)                     | 3 (100%)                   |
| age                      | 59.0              | 59.0               | 59.0                            | 62.0                        | 59.0 [51.0;66.0]         | 59.0 [51.0;66.0]  | 60.0 [53.0;66.0]               | 61.0 [50.5;66.5]           |
| sex:                     |                   |                    |                                 |                             |                          |                   |                                |                            |
| Males, n(%)              | 104756            | 100188             | 4518 (86.9%)                    | 50 (92.6%)                  | 13431 (86.1%)            | 12922 (86.0%)     | 506 (87.4%)                    | 3 (100%)                   |
| GFR, ml/min              | 86.6 [71.3;103]   | 86.6 [71.2;103]    | 86.9 [71.9;102]                 | 88.4 [75.2;102]             | 84.6 [69.2;101]          | 84.5 [69.0;101]   | 88.3 [73.1;103]                | 93.4 [78.2;95.0]           |
| Diabetes, n(%)           | 40842 (33.6%)     | 39076 (33.6%)      | 1747 (33.6%)                    | 19 (35.2%)                  | 5323 (34.1%)             | 5126 (34.1%)      | 196 (33.9%)                    | 1 (33.3%)                  |
| Hypertension, n(%)       | 81626 (67.2%)     | 78099 (67.2%)      | 3487 (67.1%)                    | 40 (74.1%)                  | 10850 (69.5%)            | 10447 (69.5%)     | 401 (69.3%)                    | 2 (66.7%)                  |
| SBP, (median [IQR])      | 130 [120;139]     | 130 [120;139]      | 130 [120;140]                   | 130 [124;137]               | 130 [120;140]            | 130 [120;140]     | 131 [120;140]                  | 130 [128;132]              |
| DBP, (median [IQR])      | 79.0              | 79.0               | 79.0                            | 80.0                        | 79.0 [72.0;86.0]         | 79.0 [72.0;86.0]  | 79.0 [72.0;86.0]               | 76.0 [71.5;80.0]           |
| Num BP meds, n(%)        |                   |                    |                                 |                             |                          |                   |                                |                            |
| 0                        | 48058 (39.6%)     | 45972 (39.5%)      | 2069 (39.8%)                    | 17 (31.5%)                  | 5859 (37.5%)             | 5647 (37.6%)      | 211 (36.4%)                    | 1 (33.3%)                  |
| 1 or 2                   | 53693 (44.2%)     | 51387 (44.2%)      | 2277 (43.8%)                    | 29 (53.7%)                  | 7024 (45.0%)             | 6753 (45.0%)      | 270 (46.6%)                    | 1 (33.3%)                  |
| 3 or more                | 19741 (16.2%)     | 18879 (16.2%)      | 854 (16.4%)                     | 8 (14.8%)                   | 2721 (17.4%)             | 2622 (17.5%)      | 98 (16.9%)                     | 1 (33.3%)                  |
| BMI                      | 29.7              | 29.7               | 29.5                            | 28.0                        | 29.8 [26.2;34.1]         | 29.8 [26.2;34.1]  | 29.4 [25.7;33.4]               | 27.3 [26.6;31.7]           |
| Nephrotic Syndrome, n(%) | 910 (0.75%)       | 875 (0.75%)        | 35 (0.67%)                      | 0 (0.00%)                   | 195 (1.25%)              | 191 (1.27%)       | 4 (0.69%)                      | 0 (0.00%)                  |
| FSGS, n(%)               | 140 (0.12%)       | 136 (0.12%)        | 4 (0.08%)                       | 0 (0.00%)                   | 54 (0.35%)               | 53 (0.35%)        | 1 (0.17%)                      | 0 (0.00%)                  |
| CKD, n(%)                | 18831 (18.7%)     | 18075 (18.8%)      | 746 (17.4%)                     | 10 (20.8%)                  | 2967 (23.5%)             | 2896 (23.8%)      | 71 (15.6%)                     | 0 (0.00%)                  |
| CKD prior to enrollment  | 16577 (15.7%)     | 15892 (15.7%)      | 677 (15.0%)                     | 8 (16.0%)                   | 2740 (20.4%)             | 2677 (20.7%)      | 63 (13.0%)                     | 0 (0.00%)                  |
| CKD after enrollment     | 7556 (7.14%)      | 7256 (7.17%)       | 296 (6.55%)                     | 4 (8.00%)                   | 1005 (7.49%)             | 968 (7.49%)       | 36 (7.44%)                     | 1 (33.3%)                  |
| ESRD:                    | 4177 (3.44%)      | 4027 (3.46%)       | 149 (2.87%)                     | 1 (1.85%)                   | 1068 (6.84%)             | 1054 (7.02%)      | 14 (2.42%)                     | 0 (0.00%)                  |
| ESRD prior to enrollment | 2196 (1.81%)      | 2126 (1.83%)       | 69 (1.33%)                      | 1 (1.85%)                   | 690 (4.42%)              | 680 (4.53%)       | 10 (1.73%)                     | 0 (0.00%)                  |
| ESRD after enrollment    | 1981 (1.63%)      | 1901 (1.64%)       | 80 (1.54%)                      | 0 (0.00%)                   | 378 (2.42%)              | 374 (2.49%)       | 4 (0.69%)                      | 0 (0.00%)                  |
| RAASi, n(%)              | 48792 (40.2%)     | 46681 (40.2%)      | 2091 (40.2%)                    | 20 (37.0%)                  | 6435 (41.2%)             | 6201 (41.3%)      | 232 (40.1%)                    | 2 (66.7%)                  |
| ADPKD, n(%)              | 424 (0.35%)       | 405 (0.35%)        | 19 (0.37%)                      | 0 (0.00%)                   | 83 (0.53%)               | 81 (0.54%)        | 2 (0.35%)                      | 0 (0.00%)                  |
| Proteinuria, n(%)        |                   |                    |                                 |                             |                          |                   |                                |                            |
| Negative/Trace           | 67636 (81.1%)     | 64692 (81.1%)      | 2916 (81.5%)                    | 28 (70.0%)                  | 8283 (77.1%)             | 7953 (77.0%)      | 329 (79.9%)                    | 1 (33.3%)                  |
| 1+                       | 9094 (10.9%)      | 8664 (10.9%)       | 422 (11.8%)                     | 8 (20.0%)                   | 1322 (12.3%)             | 1263 (12.2%)      | 57 (13.8%)                     | 2 (66.7%)                  |
| >= 2+                    | 6701 (8.03%)      | 6457 (8.09%)       | 240 (6.71%)                     | 4 (10.0%)                   | 1143 (10.6%)             | 1117 (10.8%)      | 26 (6.31%)                     | 0 (0.00%)                  |

**Supplementary Table 8:** BioVU *APOL1* association with kidney disease outcomes amongst non-diabetic individuals. The risk of kidney outcomes associate with *APOL1* high risk variants (*APOL1* HR) is not observed in the presence of *APOL1* N264K+ and is comparable to *APOL1* low risk (*APOL1* LR).

| <b><i>APOL1</i> genetic variants in BioVU</b> | <i>N</i> | <i>N with ESKD</i> | <i>ESKD Odds Ratio (95% CI)</i> | <i>N with CKD</i> | <i>CKD Odds Ratio (95% CI)</i> |
|-----------------------------------------------|----------|--------------------|---------------------------------|-------------------|--------------------------------|
| <i>APOL1</i> LR, N264K-                       | 9,348    | 103                | 1.0 (ref)                       | 265               | 1.0 (ref)                      |
| <b><i>APOL1</i> HR, N264K-</b>                | 1,670    | 101                | 5.79<br>(4.38, 7.68)            | 112               | <b>2.54</b><br>(2.01, 3.20)    |
| <i>APOL1</i> LR, N264K+                       | 481      | 4                  | 0.74<br>(0.27, 2.01)            | 12                | 0.85<br>(0.47, 1.54)           |
| <b><i>APOL1</i> HR, N264K+</b>                | 82       | 0                  | -                               | 1                 | <b>0.36</b><br>(0.05, 2.64)    |

Logistic regression was used to evaluate the association of *APOL1* high-risk and p.N264K allele genotype and CKD. Odds ratios were adjusted for age, gender and 10 principal components of ancestry. Interaction is not tested given small sample size.

**Supplementary Table 9:** All of Us *APOL1* association with kidney disease outcomes amongst non-diabetic individuals. The risk of kidney outcomes associate with *APOL1* high risk variants (*APOL1* HR) is not observed in the presence of *APOL1* N264K+ and is comparable to *APOL1* low risk (*APOL1* LR).

| <b><i>APOL1</i> genetic variants<br/>in All of Us</b> | <i>N</i> | <i>N</i> with ESKD | ESKD<br>Odds Ratio<br>(95% CI) | <i>N</i> with CKD | CKD<br>Odds Ratio<br>(95% CI) |
|-------------------------------------------------------|----------|--------------------|--------------------------------|-------------------|-------------------------------|
| <i>APOL1</i> LR, N264K-                               | 9192     | 84                 | 1.0 (ref)                      | 760               | 1.0 (ref)                     |
| <b><i>APOL1</i> HR, N264K-</b>                        | 1407     | 58                 | 4.94<br>(3.48–7.02)            | 173               | <b>1.81</b><br>(1.49–2.20)    |
| <i>APOL1</i> LR, N264K+                               | 449      | 3                  | 0.74<br>(0.23–2.35)            | 41                | 0.76<br>(0.53–1.09)           |
| <b><i>APOL1</i> HR, N264K+</b>                        | 77       | 1                  | 1.36<br>(0.19–10.05)           | 6                 | <b>0.73</b><br>(0.28–1.88)    |

Logistic regression was used to evaluate the association of *APOL1* high-risk and p.N264K allele genotype and CKD. Odds ratios were adjusted for age, gender and 10 principal components of ancestry. Interaction is not tested given small sample size.

**Supplementary Table 10.** VA Million Veteran Program: Core Acknowledgement for Publications  
February 2023

**MVP Program Office**

- Sumitra Muralidhar, Ph.D., Program Director  
US Department of Veterans Affairs, 810 Vermont Avenue NW, Washington, DC 20420
- Jennifer Moser, Ph.D., Associate Director, Scientific Programs  
US Department of Veterans Affairs, 810 Vermont Avenue NW, Washington, DC 20420
- Jennifer E. Deen, B.S., Associate Director, Cohort & Public Relations  
US Department of Veterans Affairs, 810 Vermont Avenue NW, Washington, DC 20420

**MVP Executive Committee**

- Co-Chair: Philip S. Tsao, Ph.D.  
VA Palo Alto Health Care System, 3801 Miranda Avenue, Palo Alto, CA 94304
- Co-Chair: Sumitra Muralidhar, Ph.D.  
US Department of Veterans Affairs, 810 Vermont Avenue NW, Washington, DC 20420
- J. Michael Gaziano, M.D., M.P.H.  
VA Boston Healthcare System, 150 S. Huntington Avenue, Boston, MA 02130
- Elizabeth Hauser, Ph.D.  
Durham VA Medical Center, 508 Fulton Street, Durham, NC 27705
- Amy Kilbourne, Ph.D., M.P.H.  
VA HSR&D, 2215 Fuller Road, Ann Arbor, MI 48105
- Shih-Wen Luoh, M.D., Ph.D.  
VA Portland Health Care System, 3710 SW US Veterans Hospital Rd, Portland, OR 97239
- Michael Matheny, M.D., M.S., M.P.H.  
VA Tennessee Valley Healthcare System, 1310 24<sup>th</sup> Ave. South, Nashville, TN 37212
- Dave Oslin, M.D.  
Philadelphia VA Medical Center, 3900 Woodland Avenue, Philadelphia, PA 19104

**MVP Co-Principal Investigators**

- J. Michael Gaziano, M.D., M.P.H.  
VA Boston Healthcare System, 150 S. Huntington Avenue, Boston, MA 02130
- Philip S. Tsao, Ph.D.  
VA Palo Alto Health Care System, 3801 Miranda Avenue, Palo Alto, CA 94304

**MVP Core Operations**

- Lori Churby, B.S., Director, MVP Regulatory Affairs  
VA Palo Alto Health Care System, 3801 Miranda Avenue, Palo Alto, CA 94304
- Stacey B. Whitbourne, Ph.D., Director, MVP Cohort Management  
VA Boston Healthcare System, 150 S. Huntington Avenue, Boston, MA 02130
- Jessica V. Brewer, M.P.H., Director, MVP Recruitment & Enrollment

- VA Boston Healthcare System, 150 S. Huntington Avenue, Boston, MA 02130
- Shahpoor (Alex) Shayan, M.S., Director, MVP Recruitment and Enrollment Informatics  
VA Boston Healthcare System, 150 S. Huntington Avenue, Boston, MA 02130
- Luis E. Selva, Ph.D., Executive Director, MVP Biorepositories  
VA Boston Healthcare System, 150 S. Huntington Avenue, Boston, MA 02130
- Saiju Pyarajan Ph.D., Director, Data and Computational Sciences  
VA Boston Healthcare System, 150 S. Huntington Avenue, Boston, MA 02130
- Kelly Cho, M.P.H, Ph.D., Director, MVP Phenomics Data Core  
VA Boston Healthcare System, 150 S. Huntington Avenue, Boston, MA 02130
- Scott L. DuVall, Ph.D., Director, VA Informatics and Computing Infrastructure (VINCI)  
VA Salt Lake City Health Care System, 500 Foothill Drive, Salt Lake City, UT 84148
- Mary T. Brophy M.D., M.P.H., Director, VA Central Biorepository  
VA Boston Healthcare System, 150 S. Huntington Avenue, Boston, MA 02130
- MVP Coordinating Centers
  - o MVP Coordinating Center, Boston - J. Michael Gaziano, M.D., M.P.H.  
VA Boston Healthcare System, 150 S. Huntington Avenue, Boston, MA 02130
  - o MVP Coordinating Center, Palo Alto – Philip S. Tsao, Ph.D.  
VA Palo Alto Health Care System, 3801 Miranda Avenue, Palo Alto, CA 94304
  - o MVP Information Center, Canandaigua – Brady Stephens, M.S.  
Canandaigua VA Medical Center, 400 Fort Hill Avenue, Canandaigua, NY 14424
  - o Cooperative Studies Program Clinical Research Pharmacy Coordinating Center,  
Albuquerque – Todd Connor, Pharm.D.; Dean P. Argyres, B.S., M.S.  
New Mexico VA Health Care System, 1501 San Pedro Drive SE, Albuquerque,  
NM 87108

### **MVP Publications and Presentations Committee**

- Co-Chair: Tim Assimes, M.D.  
VA Palo Alto Health Care System, 3801 Miranda Avenue, Palo Alto, CA 94304
- Co-Chair: Adriana Hung, M.D.  
VA Tennessee Valley Healthcare System, 1310 24<sup>th</sup> Ave. South, Nashville, TN 37212
- Co-Chair: Henry Kranzler, M.D.  
Philadelphia VA Medical Center, 3900 Woodland Avenue, Philadelphia, PA 19104

### **MVP Local Site Investigators**

- Samuel Aguayo, M.D., Phoenix VA Health Care System  
650 E. Indian School Road, Phoenix, AZ 85012
- Sunil Ahuja, M.D., South Texas Veterans Health Care System  
7400 Merton Minter Boulevard, San Antonio, TX 78229
- Kathrina Alexander, M.D., Veterans Health Care System of the Ozarks  
1100 North College Avenue, Fayetteville, AR 72703
- Xiao M. Androulakis, M.D., Columbia VA Health Care System  
6439 Garners Ferry Road, Columbia, SC 29209
- Prakash Balasubramanian, M.D., William S. Middleton Memorial Veterans Hospital  
2500 Overlook Terrace, Madison, WI 53705

- Zuhair Ballas, M.D., Iowa City VA Health Care System  
601 Highway 6 West, Iowa City, IA 52246-2208
- Jean Beckham, Ph.D., Durham VA Medical Center  
508 Fulton Street, Durham, NC 27705
- Sujata Bhushan, M.D., VA North Texas Health Care System  
4500 S. Lancaster Road, Dallas, TX 75216
- Edward Boyko, M.D., VA Puget Sound Health Care System  
1660 S. Columbian Way, Seattle, WA 98108-1597
- David Cohen, M.D., Portland VA Medical Center  
3710 SW U.S. Veterans Hospital Road, Portland, OR 97239
- Louis Dellitalia, M.D., Birmingham VA Medical Center  
700 S. 19th Street, Birmingham AL 35233
- L. Christine Faulk, M.D., Robert J. Dole VA Medical Center  
5500 East Kellogg Drive, Wichita, KS 67218-1607
- Joseph Fayad, M.D., VA Southern Nevada Healthcare System  
6900 North Pecos Road, North Las Vegas, NV 89086
- Daryl Fujii, Ph.D., VA Pacific Islands Health Care System  
459 Patterson Rd, Honolulu, HI 96819
- Saib Gappy, M.D., John D. Dingell VA Medical Center  
4646 John R Street, Detroit, MI 48201
- Frank Gesek, Ph.D., White River Junction VA Medical Center  
163 Veterans Drive, White River Junction, VT 05009
- Jennifer Greco, M.D., Sioux Falls VA Health Care System  
2501 W 22nd Street, Sioux Falls, SD 57105
- Michael Godschalk, M.D., Richmond VA Medical Center  
1201 Broad Rock Blvd., Richmond, VA 23249
- Todd W. Gress, M.D., Ph.D., Hershel “Woody” Williams VA Medical Center  
1540 Spring Valley Drive, Huntington, WV 25704
- Samir Gupta, M.D., M.S.C.S., VA San Diego Healthcare System  
3350 La Jolla Village Drive, San Diego, CA 92161
- Salvador Gutierrez, M.D., Edward Hines, Jr. VA Medical Center  
5000 South 5th Avenue, Hines, IL 60141
- John Harley, M.D., Ph.D., Cincinnati VA Medical Center  
3200 Vine Street, Cincinnati, OH 45220
- Kimberly Hammer, Ph.D., Fargo VA Health Care System  
2101 N. Elm, Fargo, ND 58102
- Mark Hamner, M.D., Ralph H. Johnson VA Medical Center  
109 Bee Street, Mental Health Research, Charleston, SC 29401
- Adriana Hung, M.D., M.P.H., VA Tennessee Valley Healthcare System  
1310 24th Avenue, South Nashville, TN 37212
- Robin Hurley, M.D., W.G. (Bill) Hefner VA Medical Center  
1601 Brenner Ave, Salisbury, NC 28144
- Pran Iruvanti, D.O., Ph.D., Hampton VA Medical Center  
100 Emancipation Drive, Hampton, VA 23667
- Frank Jacono, M.D., VA Northeast Ohio Healthcare System  
10701 East Boulevard, Cleveland, OH 44106

- Darshana Jhala, M.D., Philadelphia VA Medical Center  
3900 Woodland Avenue, Philadelphia, PA 19104
- Scott Kinlay, M.B.B.S., Ph.D., VA Boston Healthcare System  
150 S. Huntington Avenue, Boston, MA 02130
- Jon Klein, M.D., Ph.D., Louisville VA Medical Center  
800 Zorn Avenue, Louisville, KY 40206
- Michael Landry, Ph.D., Southeast Louisiana Veterans Health Care System  
2400 Canal Street, New Orleans, LA 70119
- Peter Liang, M.D., M.P.H., VA New York Harbor Healthcare System  
423 East 23rd Street, New York, NY 10010
- Suthat Liangpunsakul, M.D., M.P.H., Richard Roudebush VA Medical Center  
1481 West 10th Street, Indianapolis, IN 46202
- Jack Lichy, M.D., Ph.D., Washington DC VA Medical Center  
50 Irving St, Washington, D. C. 20422
- C. Scott Mahan, M.D., Charles George VA Medical Center  
1100 Tunnel Road, Asheville, NC 28805
- Ronnie Marrache, M.D., VA Maine Healthcare System  
1 VA Center, Augusta, ME 04330
- Stephen Mastorides, M.D., James A. Haley Veterans' Hospital  
13000 Bruce B. Downs Blvd, Tampa, FL 33612
- Elisabeth Mates M.D., Ph.D., VA Sierra Nevada Health Care System  
975 Kirman Avenue, Reno, NV 89502
- Kristin Mattocks, Ph.D., M.P.H., Central Western Massachusetts Healthcare System  
421 North Main Street, Leeds, MA 01053
- Paul Meyer, M.D., Ph.D., Southern Arizona VA Health Care System  
3601 S 6th Avenue, Tucson, AZ 85723
- Jonathan Moorman, M.D., Ph.D., James H. Quillen VA Medical Center  
Corner of Lamont & Veterans Way, Mountain Home, TN 37684
- Timothy Morgan, M.D., VA Long Beach Healthcare System  
5901 East 7th Street Long Beach, CA 90822
- Maureen Murdoch, M.D., M.P.H., Minneapolis VA Health Care System  
One Veterans Drive, Minneapolis, MN 55417
- James Norton, Ph.D., VA Health Care Upstate New York  
113 Holland Avenue, Albany, NY 12208
- Olaoluwa Okusaga, M.D., Michael E. DeBakey VA Medical Center  
2002 Holcombe Blvd, Houston, TX 77030
- Kris Ann Oursler, M.D., Salem VA Medical Center  
1970 Roanoke Blvd, Salem, VA 24153
- Ana Palacio, M.D., M.P.H., Miami VA Health Care System  
1201 NW 16th Street, 11 GRC, Miami FL 33125
- Samuel Poon, M.D., Manchester VA Medical Center  
718 Smyth Road, Manchester, NH 03104
- Emily Potter, Pharm.D., VA Eastern Kansas Health Care System  
4101 S 4th Street Trafficway, Leavenworth, KS 66048
- Michael Rauchman, M.D., St. Louis VA Health Care System  
915 North Grand Blvd, St. Louis, MO 63106

- Richard Servatius, Ph.D., Syracuse VA Medical Center  
800 Irving Avenue, Syracuse, NY 13210
- Satish Sharma, M.D., Providence VA Medical Center  
830 Chalkstone Avenue, Providence, RI 02908
- River Smith, Ph.D., Eastern Oklahoma VA Health Care System  
1011 Honor Heights Drive, Muskogee, OK 74401
- Peruvemba Sriram, M.D., N. FL/S. GA Veterans Health System  
1601 SW Archer Road, Gainesville, FL 32608
- Patrick Strollo, Jr., M.D., VA Pittsburgh Health Care System  
University Drive, Pittsburgh, PA 15240
- Neeraj Tandon, M.D., Overton Brooks VA Medical Center  
510 East Stoner Ave, Shreveport, LA 71101
- Philip Tsao, Ph.D., VA Palo Alto Health Care System  
3801 Miranda Avenue, Palo Alto, CA 94304-1290
- Gerardo Villareal, M.D., New Mexico VA Health Care System  
1501 San Pedro Drive, S.E. Albuquerque, NM 87108
- Agnes Wallbom, M.D., M.S., VA Greater Los Angeles Health Care System  
11301 Wilshire Blvd, Los Angeles, CA 90073
- Jessica Walsh, M.D., VA Salt Lake City Health Care System  
500 Foothill Drive, Salt Lake City, UT 84148
- John Wells, Ph.D., Edith Nourse Rogers Memorial Veterans Hospital  
200 Springs Road, Bedford, MA 01730
- Jeffrey Whittle, M.D., M.P.H., Clement J. Zablocki VA Medical Center  
5000 West National Avenue, Milwaukee, WI 53295
- Mary Whooley, M.D., San Francisco VA Health Care System  
4150 Clement Street, San Francisco, CA 94121
- Allison E. Williams, N.D., Ph.D., R.N., Bay Pines VA Healthcare System  
10,000 Bay Pines Blvd Bay Pines, FL 33744
- Peter Wilson, M.D., Atlanta VA Medical Center  
1670 Clairmont Road, Decatur, GA 30033
- Junzhe Xu, M.D., VA Western New York Healthcare System  
3495 Bailey Avenue, Buffalo, NY 14215-1199
- Shing Shing Yeh, Ph.D., M.D., Northport VA Medical Center  
79 Middleville Road, Northport, NY 11768



Supplementary Table 11. Haplotype frequency of APOL1 protein-altering variants in African populations with more than 20 individuals for the haplotype in the Million Veteran Program.

| haplotype   | G96R       | E150K     | N176S       | I228M    | K255R    | N264K      | G270D      | E337N      | S342G      | I384M      | Asn388_Tyr389del | count | freq   |
|-------------|------------|-----------|-------------|----------|----------|------------|------------|------------|------------|------------|------------------|-------|--------|
|             | 0          | 1         | 0           | 1        | 1        | 0          | 0          | 0          | 0          | 0          | 0                | 70375 | 0.2858 |
| G1          | 0          | 0         | 0           | 1        | 1        | 0          | 0          | 0          | 1          | 1          | 0                | 52918 | 0.2149 |
|             | 0          | 0         | 0           | 1        | 1        | 0          | 0          | 0          | 0          | 0          | 0                | 33163 | 0.1347 |
| G2          | 0          | 0         | 0           | 1        | 1        | 0          | 0          | 0          | 0          | 0          | 1                | 30587 | 0.1242 |
|             | 0          | 0         | 0           | 0        | 0        | 0          | 0          | 0          | 0          | 0          | 0                | 11480 | 0.0466 |
|             | 0          | 0         | 1           | 1        | 1        | 0          | 0          | 1          | 0          | 0          | 0                | 11018 | 0.0447 |
|             | 1          | 1         | 0           | 1        | 1        | 0          | 0          | 0          | 0          | 0          | 0                | 10512 | 0.0427 |
|             | 0          | 0         | 0           | 1        | 1        | 0          | 0          | 1          | 0          | 0          | 0                | 5791  | 0.0235 |
| N264K       | 0          | 1         | 0           | 1        | 1        | 1          | 0          | 0          | 0          | 0          | 0                | 3627  | 0.0147 |
|             | 0          | 0         | 0           | 1        | 1        | 0          | 1          | 1          | 0          | 0          | 0                | 1990  | 0.0081 |
|             | 0          | 0         | 0           | 0        | 1        | 0          | 0          | 0          | 0          | 0          | 0                | 1714  | 0.007  |
| N264K_G2    | 0          | 1         | 0           | 1        | 1        | 1          | 0          | 0          | 0          | 0          | 1                | 1595  | 0.0065 |
| G2          | 0          | 1         | 0           | 1        | 1        | 0          | 0          | 0          | 0          | 0          | 1                | 332   | 0.0013 |
| rsID        | rs41297245 | rs2239785 | rs116136671 | rs136175 | rs136176 | rs73885316 | rs73403889 | rs16996616 | rs73885319 | rs60910145 | rs71785313       |       |        |
| aa_change   | G96R       | E150K     | N176S       | I228M    | K255R    | N264K      | G270D      | E337N      | S342G      | I384M      | Asn388_Tyr389del |       |        |
| pos(GRCh37) | 36657740   | 36661330  | 36661409    | 36661566 | 36661646 | 36661674   | 36661691   | 36661891   | 36661906   | 36662034   | 36662041         |       |        |
| Ref AF      | G=0.9552   | G=0.6380  | A=0.9536    | G=0.0557 | G=0.0485 | C=0.9783   | G=0.9902   | G=0.9214   | A=0.7782   | T=0.7806   | AATAATT=0.8618   |       |        |
| Alt AF      | A=0.0448   | A=0.3620  | G=0.0464    | A=0.9443 | A=0.9515 | A=0.0217   | A=0.0098   | A=0.0786   | G=0.2218   | G=0.2194   | A=0.1382         |       |        |

**Supplementary Table 12. Distribution of N264K genotypes in APOL1 low-risk and high-risk genotypes.**

| <b>n264k</b> | <b>G0/G0</b> | <b>G0/G1</b> | <b>G0/G2</b> | <b>G1/G1</b> | <b>G1/G2</b> | <b>G2/G2</b> | <b>na</b> | <b>All</b> |
|--------------|--------------|--------------|--------------|--------------|--------------|--------------|-----------|------------|
| <b>0</b>     | 47549        | 33718        | 20015        | 6057         | 7027         | 1945         | 1072      | 117383     |
| <b>1</b>     | 2310         | 825          | 1488         |              | <b>381</b>   | <b>198</b>   | 29        | 5231       |
| <b>2</b>     | 27           |              | 24           |              |              | <b>3</b>     |           | 54         |
| <b>na</b>    | 58           | 14           | 236          |              | 87           | 54           | 3         | 452        |
| <b>All</b>   | 49944        | 34557        | 21763        | 6057         | 7495         | 2200         | 1104      | 123120     |

**Heterozygous N264K are observed in high risk APOL1 G1/G2 G2/G2**

**Homozygous N264K are observed in high risk APOL1 G2/G2**

Supplementary Figure 1. APOL1 protein expression in G0, G1, and G2 podocyte cell lines.

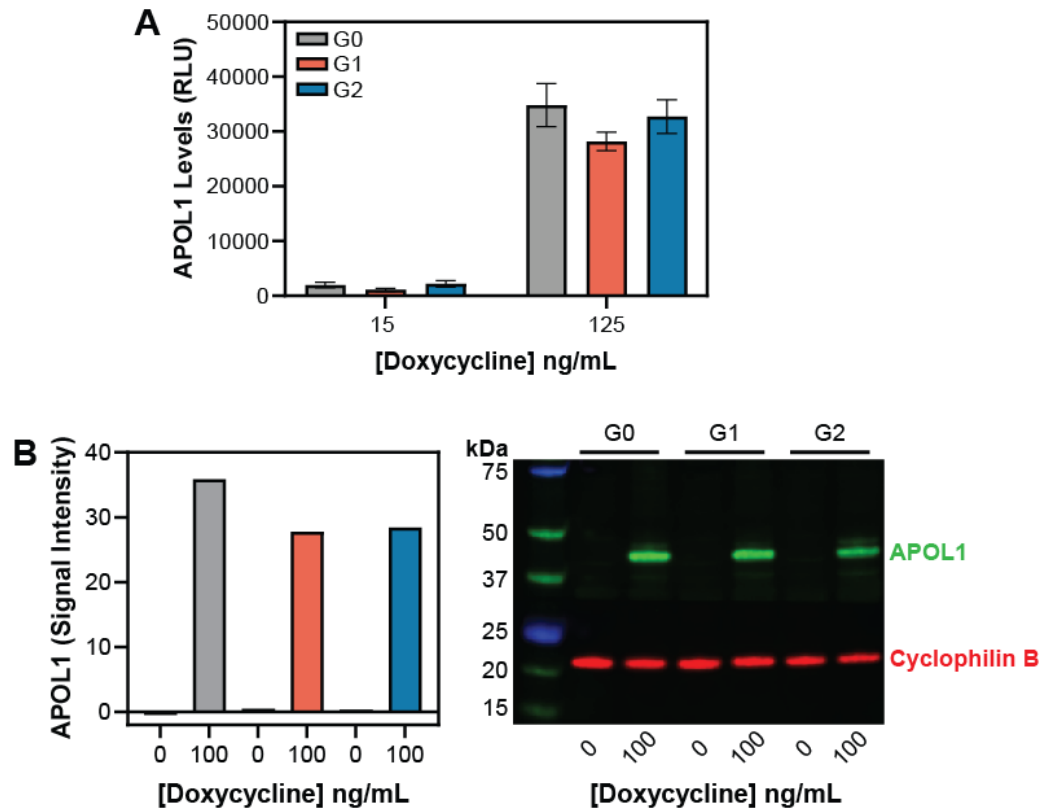

Equivalent protein expression of APOL1 G0, G1, and G2 was observed in human immortalized podocyte cell lines as measured by a (A) HitBit assay and a (B) Western blot.

**Supplementary Figure 2. Additional characterization of APOL1 cell lines utilized in the calcium uptake assay.**

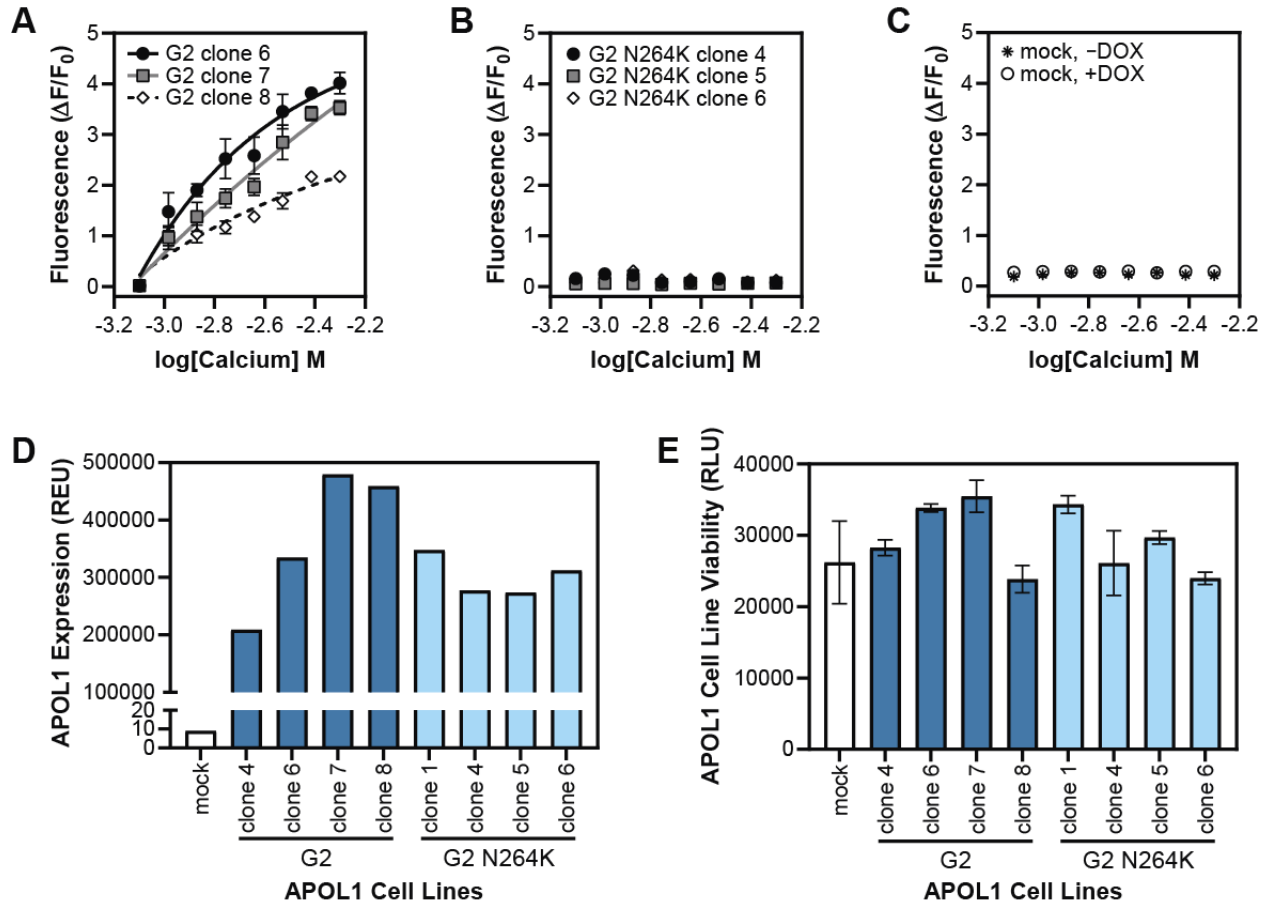

Panel A & B show the ion conductance of additional APOL1 G2 and G2 p.N264K cell lines in the presence and absence of doxycycline. Panel C shows the ion conductance of a negative control isogenic cell line, lacking the APOL1 gene, in the presence and absence of doxycycline. Panel D shows qPCR mRNA expression of APOL1 in cell lines utilized in the calcium uptake assay. Panel E shows viability of APOL1 G2 and G2 p.N264K cell lines at the time ion conductance was quantified.
